# Supplementary material for: Semi-Crystalline Hydrophobic Polyamidoamines: A New Family of Technological Materials?
Source: MDPI journal article supplement (doi:10.3390/polym13071018), 2021-03-25
Supplement: s1 [file s1]

## Supplementary Materials

# Semi-Crystalline Hydrophobic Polyamidoamines: a New Family of Technological Materials?

**Massimo Marcioni<sup>1,2</sup>, Jenny Alongi<sup>1</sup>, Elisabetta Ranucci<sup>1</sup>, Mario Malinconico<sup>3</sup>, Paola Laurienzo<sup>3</sup>, Paolo Ferruti<sup>1\*</sup> and Amedea Manfredi<sup>1\*</sup>**

<sup>1</sup> Dipartimento di Chimica, Università degli Studi di Milano, via C. Golgi 19, 20133 Milano, Italy; jenny.alongi@unimi.it (J.A.); elisabetta.ranucci@unimi.it (E.R.)

<sup>2</sup> Present address: Dipartimento di Scienza Applicata e Tecnologia, Politecnico di Torino, Alessandria campus, viale T. Michel, 15121 Alessandria, Italy; massimo.marcioni@polito.it (M.M.)

<sup>3</sup> Istituto Polimeri, Compositi e Biomateriali, Consiglio Nazionale delle Ricerche, via Campi Flegrei 34, 80078 Pozzuoli (NA), Italy; mario.malinconico@ipcb.cnr.it (M.M. CNR); paola.laurienzo@ipcb.cnr.it (P.L.)

\* Correspondence: paolo.ferruti@unimi.it (P.F.); amedeo.manfredi@unimi.it (A.M.); Tel.: +39-02-50314128 (P.F.); +39-02-50314181 (A.M.)

### **Pages S1-S47**

**Figures S1-S3:** <sup>1</sup>H-NMR spectra of bisacrylamides with assignments.

**Figures S4-S16:** <sup>1</sup>H-NMR spectra of H-PAAAs with assignments.

**Figures S17-S29:** FT-IR/ATR spectra of H-PAAAs with assignments.

**Figures S30:** TG curves of B12-DM6 derived from solution and bulk synthesis in nitrogen (a) and air (b).

**Figures S31-S44:** DSC thermograms of H-PAAAs.



## ***<sup>1</sup>H-NMR characterization***

All PAAs were characterized by <sup>1</sup>H-NMR spectroscopy, using a Bruker Avance DPX-400 NMR spectrometer (Milano, Italy) operating at 400.13 MHz. Number of scans 32, relaxation delay, *d1*, 10.0 s, receiver gain automatically measured and set by the instrument. Analyses for bisacrylamides were performed in CD<sub>3</sub>OD, for polymers in mixtures of deuterated solvents specified in figure captions.

### **B10**

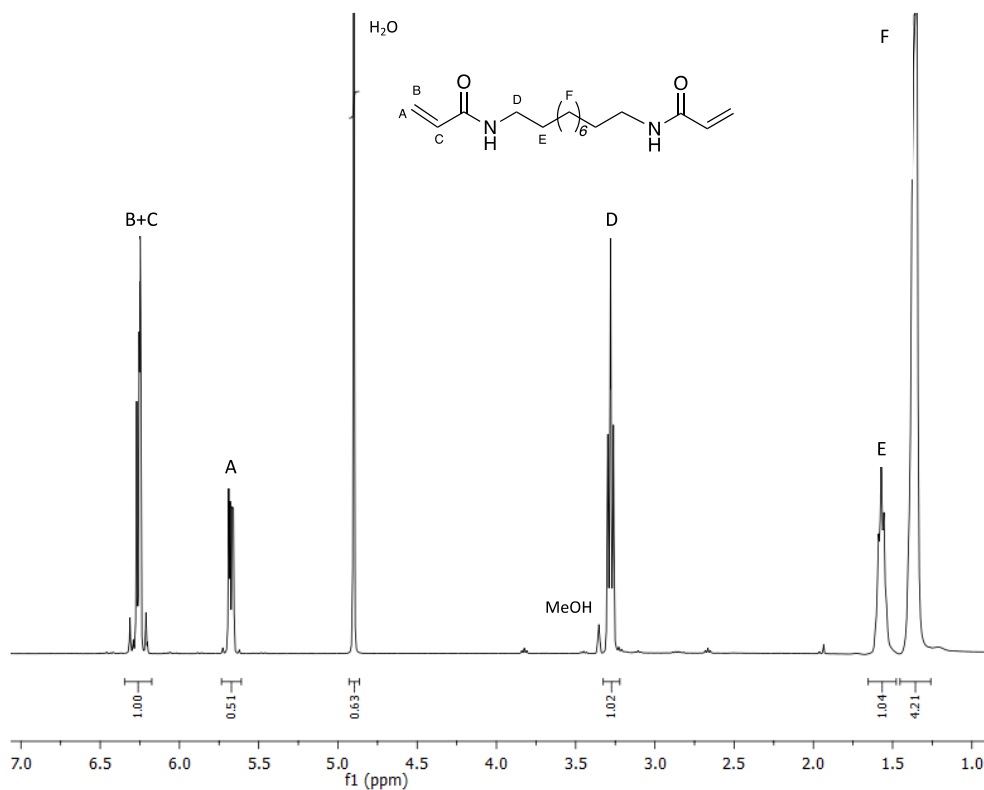

**Figure S1.** <sup>1</sup>H-NMR spectrum of B10.

<sup>1</sup>H-NMR (CD<sub>3</sub>OD)  $\delta$ : 6.29-6.19 (m, 4H, B + C), 5.66-5.63 (m, 2H, A), 3.27-3.24 (t, 4H, D), 1.55-1.53 (bt, 4H, E), 1.32 (bs, 16H, F).



## B8

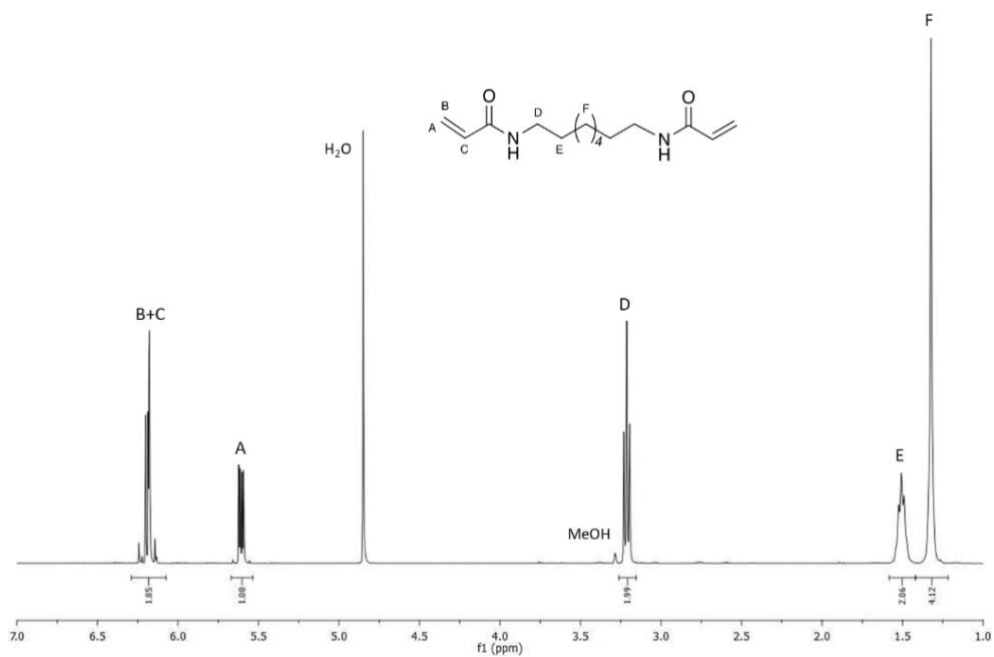

**Figure S2.**  $^1\text{H}$ -NMR spectrum of B8.

$^1\text{H}$ -NMR ( $\text{CD}_3\text{OD}$ )  $\delta$ : 6.27-6.17 (m, 4H, B + C), 5.64-5.61 (m, 2H, A), 3.25-3.22 (t, 4H, D), 1.53 (bt, 4H, E), 1.35 (bs, 8H, F).



## B6

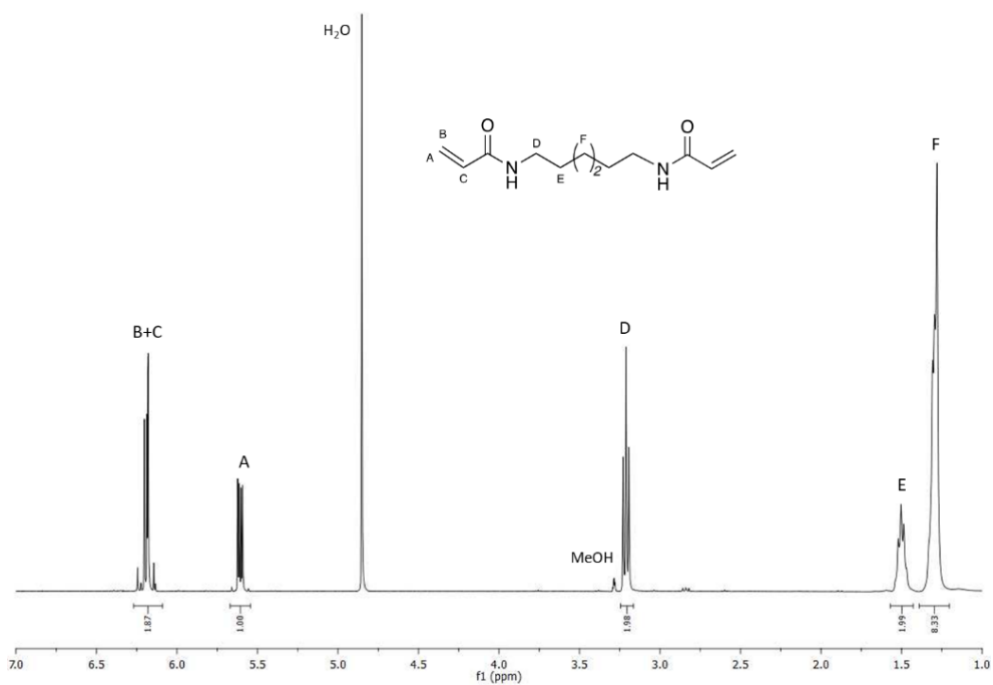

**Figure S3.** <sup>1</sup>H-NMR spectrum of B6.

<sup>1</sup>H-NMR (CD<sub>3</sub>OD)  $\delta$ : 6.29-6.18 (m, 4H, B + C), 5.67-5.64 (m, 2H, A), 3.28-3.25 (t, 4H, D), 1.58-1.55 (t, 4H, D), 1.42-1.38 (m, 8H, F).



## B12-DE2

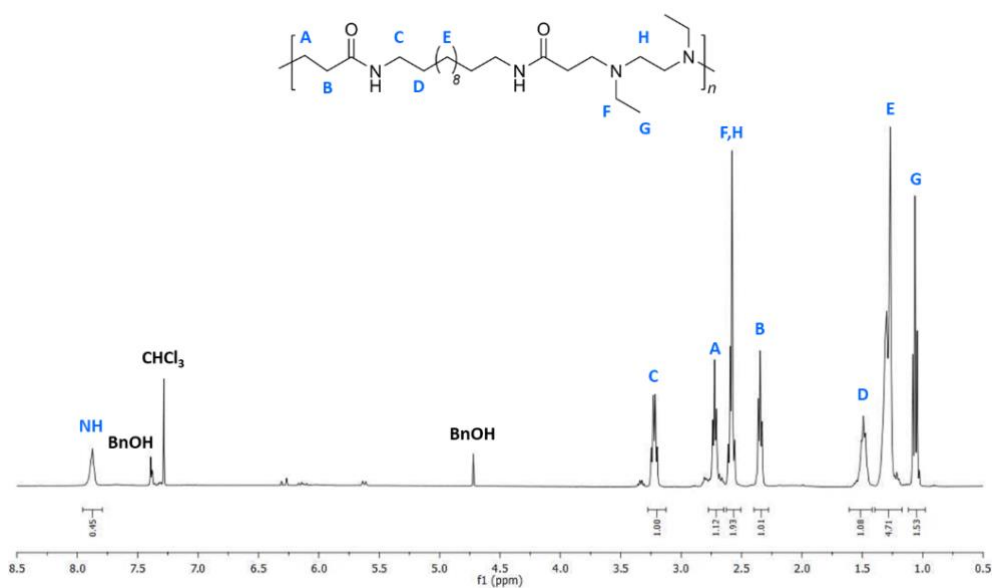

**Figure S4.** <sup>1</sup>H-NMR spectrum of B12-DE2.

<sup>1</sup>H-NMR (CDCl<sub>3</sub>) δ: 7.85 (s, 2H, NH), 3.22-3.17 (q, 4H, C), 2.72-2.69 (t, 4H, A), 2.57-2.53 (m, 8H, F,H), 2.34-2.31 (t, 4H, B), 1.48-1.45 (s, 4H, D), 1.28-1.25 (d, 16H, E), 1.06-1.02 (t, 6H, G).



## B12-DB2

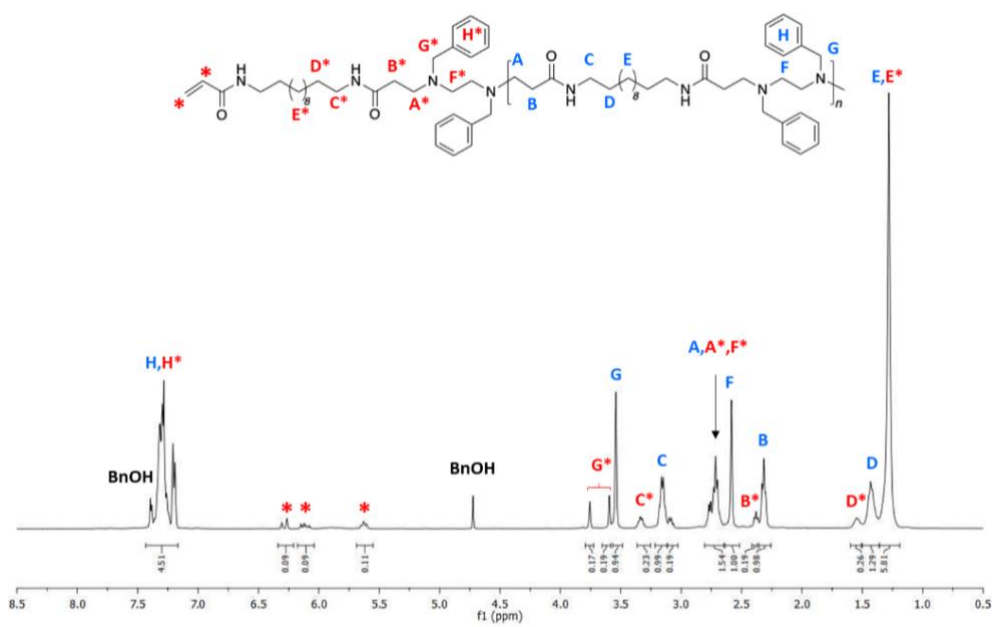

**Figure S5.** <sup>1</sup>H-NMR spectrum of B12-DB2.

<sup>1</sup>H-NMR (CDCl<sub>3</sub>) δ: 7.40-7.19 (m, 10H, H), 3.54 (s, 4H, G), 3.16-3.15 (d, 4H, C), 2.73-2.70 (t, 4H, A), 2.58 (s, 4H, F), 2.33-2.30 (t, 4H, B), 1.42 (bs, 4H, D), 1.28 (s, 16H, E).



## B12-DM6

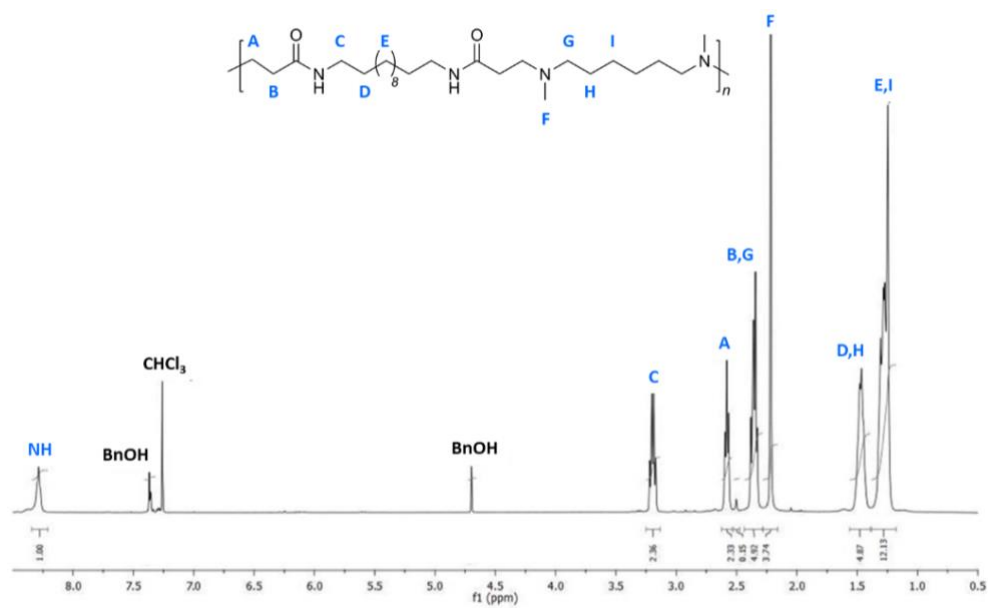

**Figure S6.** <sup>1</sup>H-NMR spectrum of B12-DM6.

<sup>1</sup>H-NMR (CDCl<sub>3</sub>)  $\delta$ : 8.20 (s, 2H, NH), 3.20-3.17 (m, 4H, C), 2.60-2.57 (t, 4H, A), 2.38-2.33 (q, 8H, B,G), 2.22 (s, 6H, F), 1.48-1.45 (m, 8H, D,H), 1.31-1.25 (m, 20H, E,I).



## B12-PIP

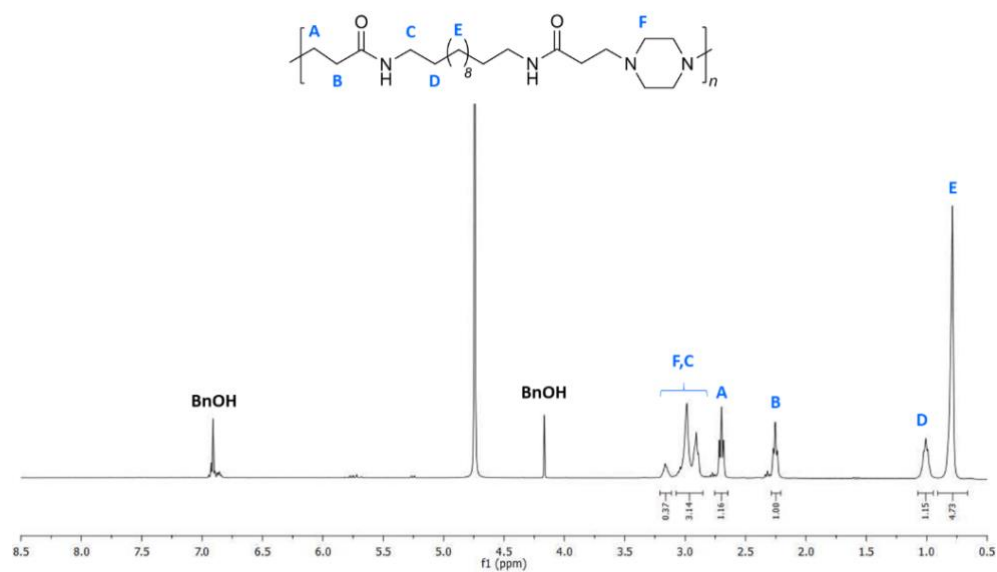

**Figure S7.** <sup>1</sup>H-NMR spectrum of B12-PIP.

<sup>1</sup>H-NMR (D<sub>2</sub>O/CD<sub>3</sub>COOD)  $\delta$ : 3.04-2.96 (m, 12H, C,F), 2.77-2.74 (t, 4H, A), 2.33-2.29 (t, 4H, B), 1.08-1.05 (bt, 4H, D), 0.84 (s, 16H, E).



## B10-DM6

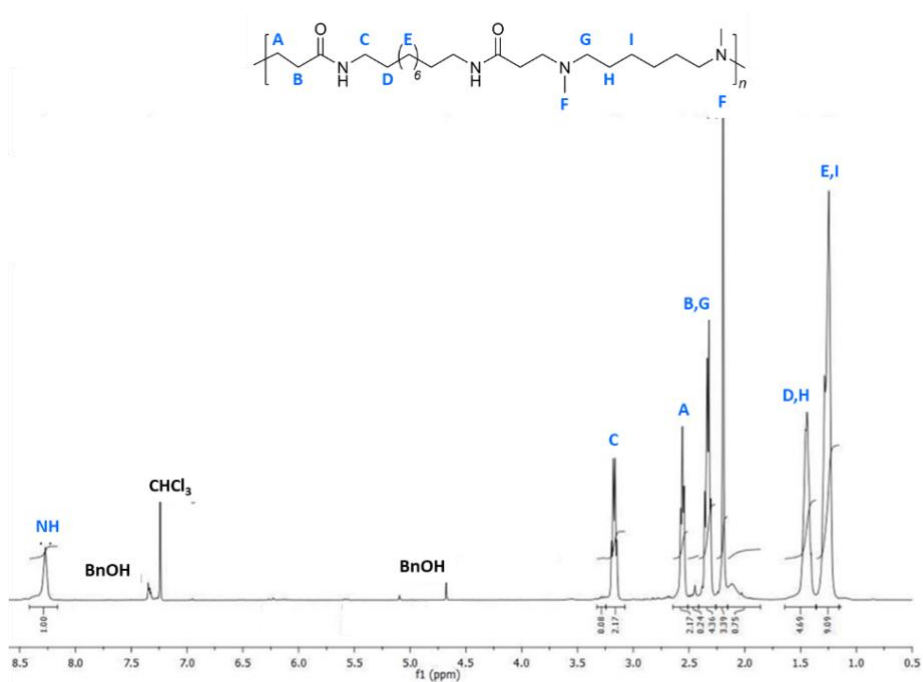

**Figure S8.**  $^1\text{H}$ -NMR spectrum of B10-DM6.

<sup>1</sup>H-NMR (CDCl<sub>3</sub>) δ: 8.27 (bs, 2H, NH), 3.19-3.15 (q, 4H, C), 2.57-2.55 (t, 4H, A), 2.36-2.31 (m, 8H, B, G), 2.19 (s, 6H, F), 1.44 (m, 8H, D, H), 1.25 (m, 16H, E, I).



## B8-DM6

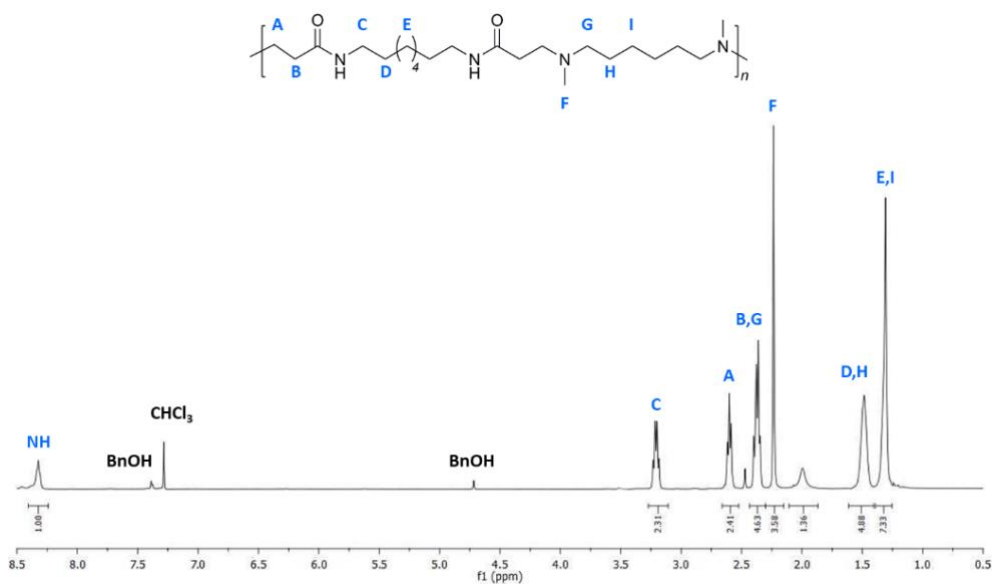

**Figure S9.** <sup>1</sup>H-NMR spectrum of B8-DM6.

<sup>1</sup>H-NMR (CDCl<sub>3</sub>)  $\delta$ : 8.28 (bs, 2H, NH), 3.19-3.14 (q, 4H, C), 2.57-2.54 (t, 4H, A), 2.35-2.30 (m, 8H, B, G), 2.19 (s, 6H, F), 1.44 (bs, 8H, D, H), 1.26 (bs, 12H, E, I).



## B6-DM2

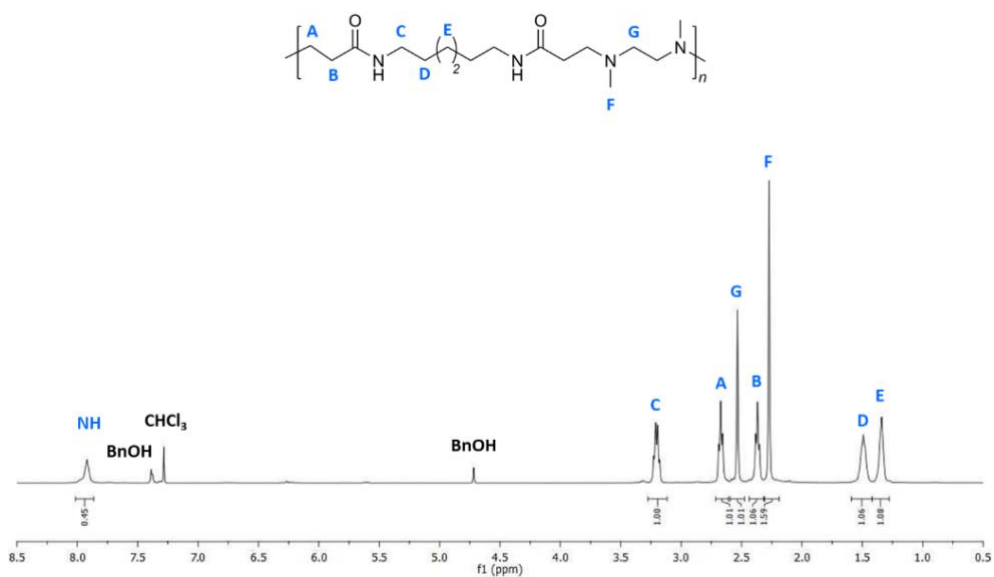

**Figure S10.** <sup>1</sup>H-NMR spectrum of B6-DM2.

<sup>1</sup>H-NMR (CDCl<sub>3</sub>) δ: 7.92 (bs, 2H, NH), 3.20-3.17 (q, 4H, C), 2.76-2.61 (t, 4H, A), 2.53 (s, 4H, G), 2.43-2.32 (t, 4H, B), 2.27 (s, 6H, F), 1.57-1.43 (bs, 4H, D), 1.41-1.24 (bs, 4H, E).



## B6-DE2

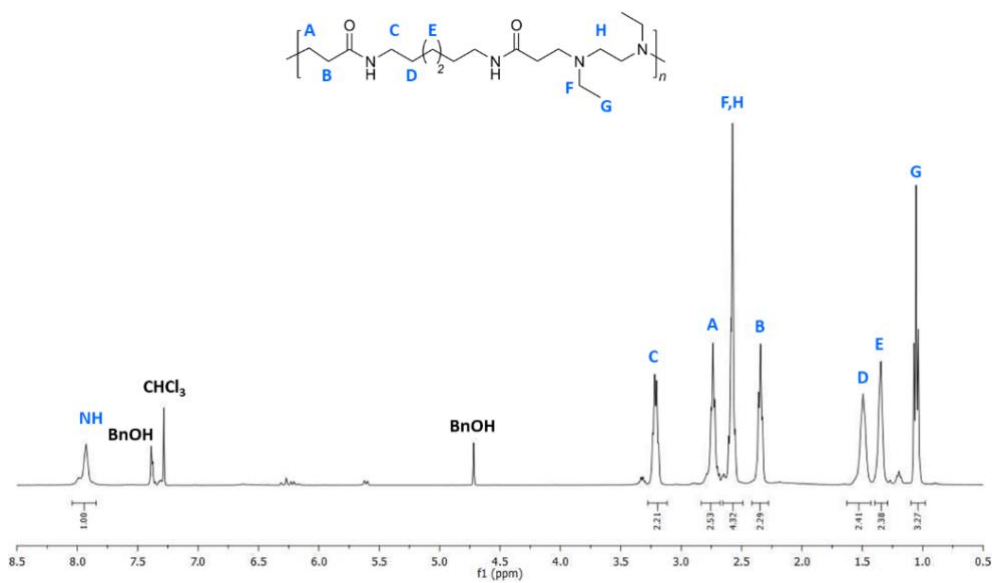

**Figure S11.** <sup>1</sup>H-NMR spectrum of B6-DE2.

<sup>1</sup>H-NMR (CDCl<sub>3</sub>) δ: 7.88 (bs, 2H, NH), 3.18-3.16 (q, 4H, C), 2.71-2.68 (t, 4H, A), 2.56-2.51 (m, 8H, F, H), 2.31-2.28 (t, 4H, B), 1.45 (bs, 4H, D), 1.30 (bs, 4H, E), 1.03-0.99 (t, 6H, G).



## B6-DB2

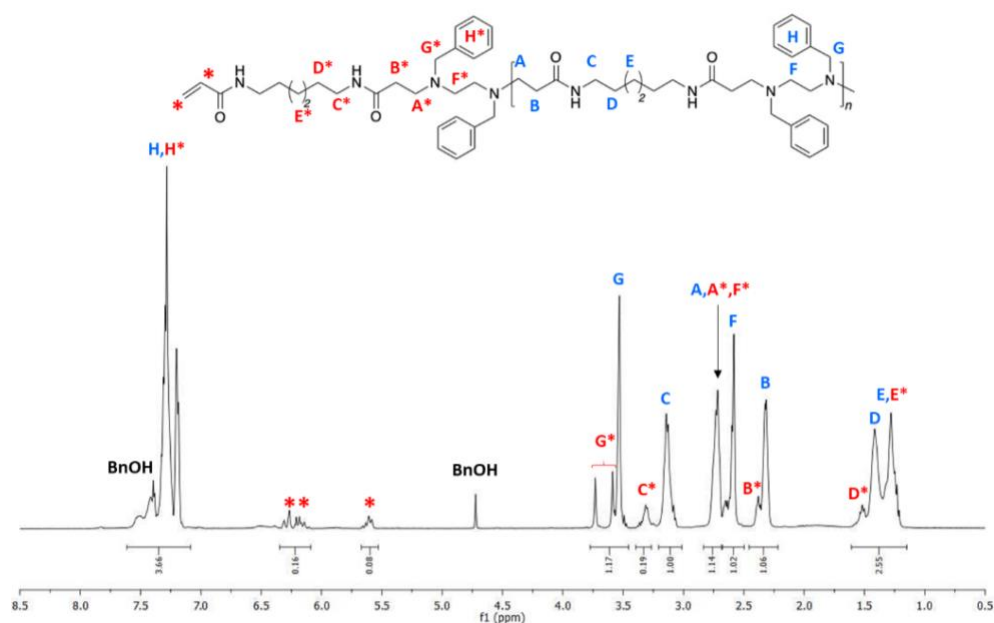

**Figure S12.** <sup>1</sup>H-NMR spectrum of B6-DB2.

<sup>1</sup>H-NMR (CDCl<sub>3</sub>) δ: 7.51-7.19 (m, 10H, H), 3.53 (s, 4H, G), 3.14-3.13 (m, 4H, C), 2.73-2.72 (m, 4H, A), 2.58 (m, 4H, F), 2.32-2.31 (m, 4H, B), 1.41-1.23 (m, 8H, D, E).



## B6-DM6

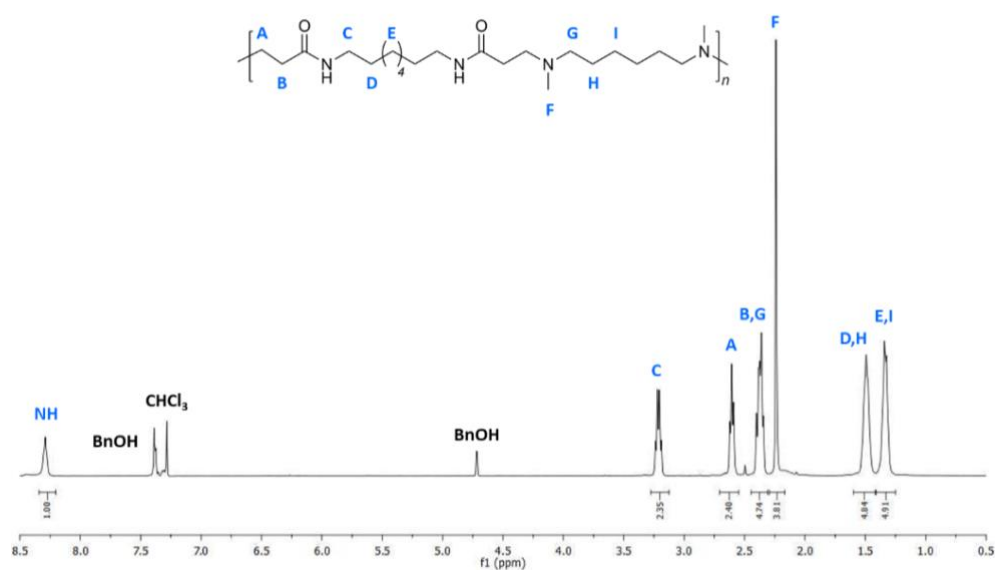

**Figure S13.** <sup>1</sup>H-NMR spectrum of B6-DM6.

<sup>1</sup>H-NMR (CDCl<sub>3</sub>) δ: 8.25 (bs, 2H, NH), 3.19-3.15 (q, 4H, C), 2.58-2.55 (t, 4H, A), 2.36-2.30 (m, 8H, B, G), 2.20 (s, 6H, F), 1.45 (s, 8H, D, H), 1.30 (m, 8H, E, I).



## B6-PIP

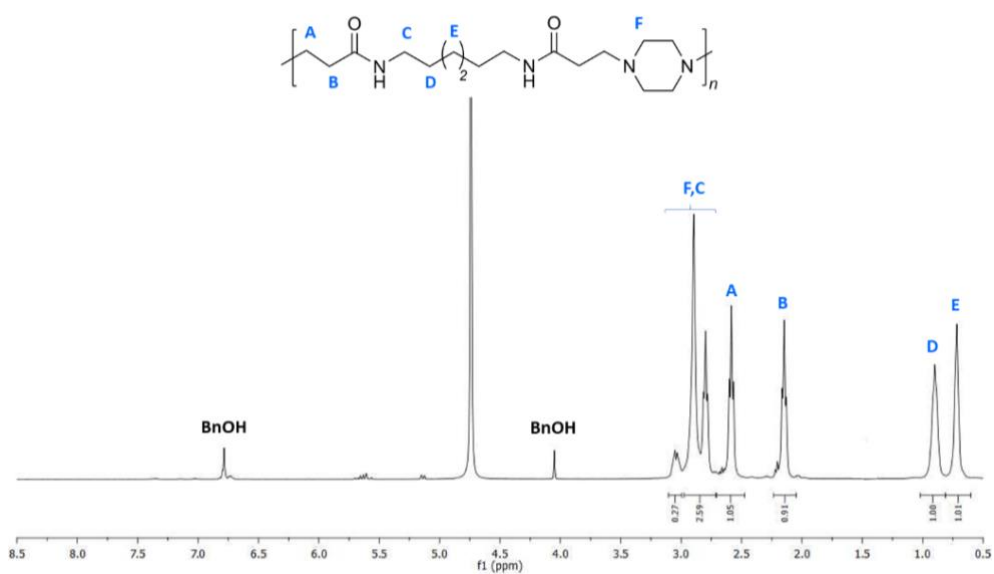

**Figure S14.**  $^1\text{H-NMR}$  of B6-PIP.

$^1\text{H-NMR}$  (D<sub>2</sub>O/CD<sub>3</sub>COOD)  $\delta$ : 3.11 (m, 12H, F, C), 2.51-2.48 (t, 4H, A), 2.07-2.04 (t, 4H, B), 0.81 (bs, 4H, D), 0.63 (bs, 4H, E).



## *b*B12-DM6

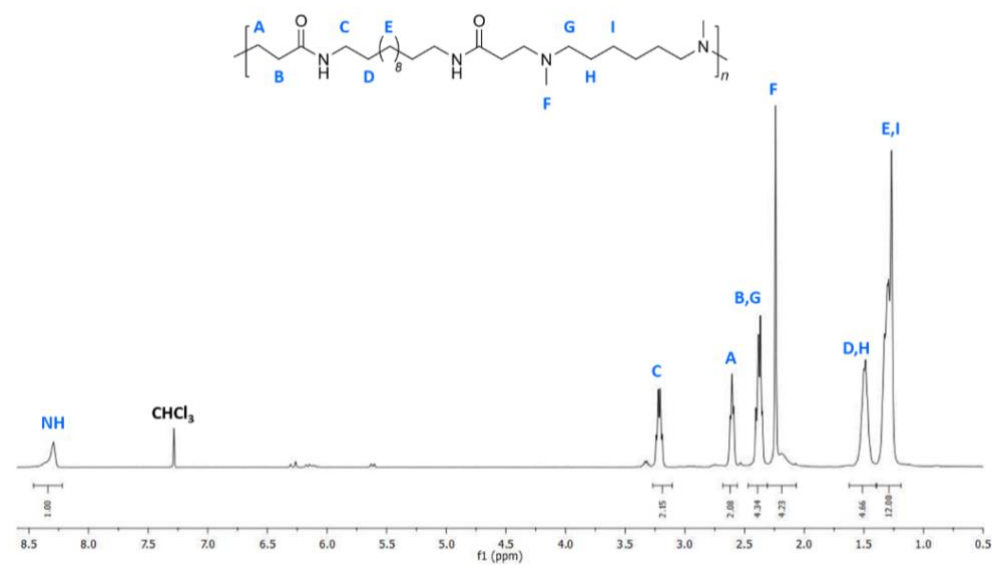

**Figure S15.** <sup>1</sup>H-NMR spectrum of B12-DM6 from bulk synthesis.

<sup>1</sup>H-NMR (CDCl<sub>3</sub>) δ: 8.30 (bs, 2H, NH), 3.22-3.21 (q, 4H, C), 2.60 (t, 4H, A), 2.36-2.38 (m, 8H, B, G), 2.23 (s, 6H, F), 1.49-1.35 (m, 8H, D, H), 1.30-1.28 (m, 20H, E, I).



## *b*B8-DM6

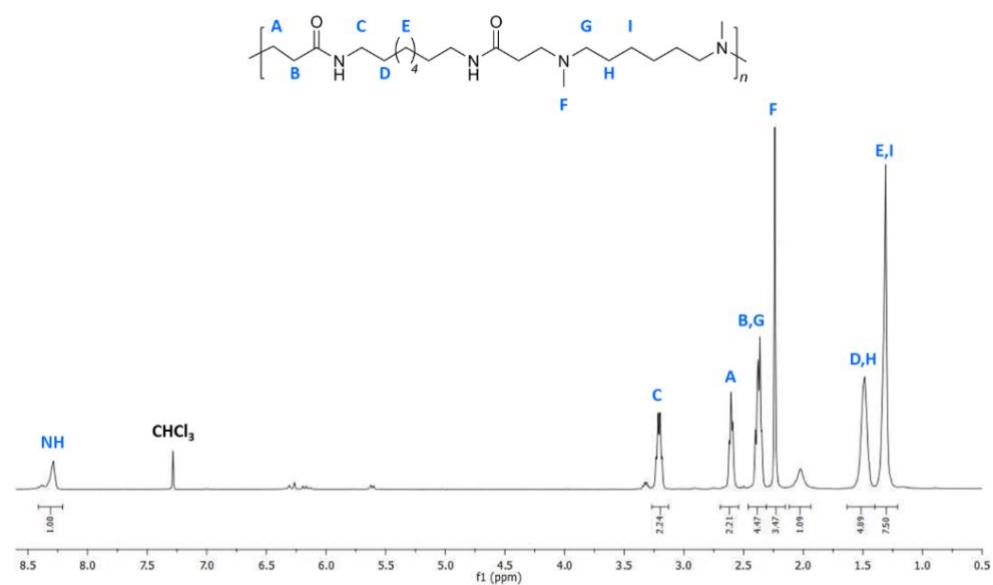

**Figure S16.** <sup>1</sup>H-NMR spectrum of B8-DM6 from bulk synthesis.

<sup>1</sup>H-NMR (CDCl<sub>3</sub>) δ: 8.29 (bs, 2H, NH), 3.25-3.16 (q, 4H, C), 2.68-2.55 (t, 4H, A), 2.45-2.30 (m, 8H, B, G), 2.24 (s, 6H, F), 1.61-1.41 (bs, 8H, D, H), 1.40-1.21 (bs, 12H, E, I).



### ***FT-IR/ATR characterization***

All PAAs were analyzed by attenuated total reflectance (ATR) Fourier transform infrared spectroscopy (FT-IR). FT-IR/ATR spectra were recorded at room temperature, in the 4000 - 380  $\text{cm}^{-1}$  wavenumber range, with 32 scans and 4  $\text{cm}^{-1}$  resolution using a Perkin-Elmer Frontier FT-IR/FIR spectrophotometer (Milano, Italy), equipped with a diamond crystal characterized by a penetration depth of 1.66  $\mu\text{m}$ .

#### **B12-DM2**

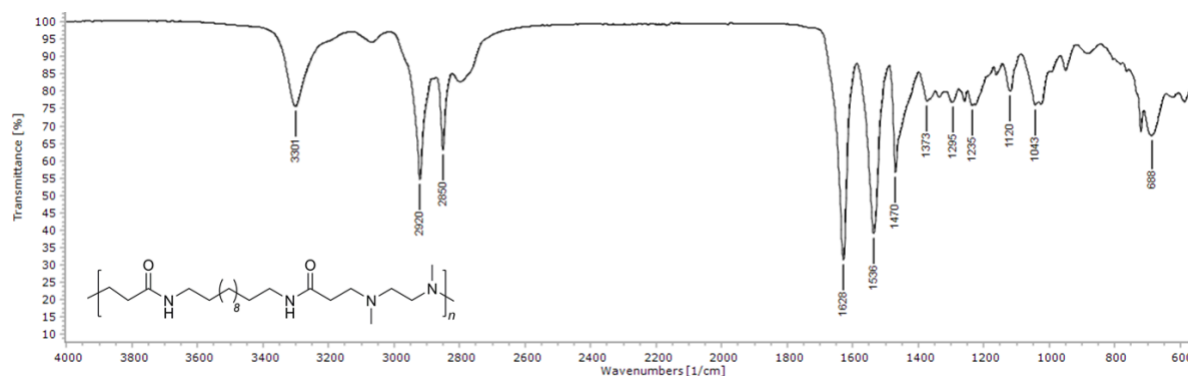

**Figure S17.** FT-IR/ATR spectrum of B12-DM2.

**Assignments:** 3301  $\text{cm}^{-1}$  (N-H stretching), 2920 and 2850  $\text{cm}^{-1}$  (C-H stretching), 1628  $\text{cm}^{-1}$  (C=O stretching), 1536  $\text{cm}^{-1}$  (N-H bending), 1470, 1373 and 1295  $\text{cm}^{-1}$  ( $\text{CH}_2$  bending), 1235 and 1043  $\text{cm}^{-1}$  (C-N stretching), 1120 and 688  $\text{cm}^{-1}$  (C-C bending).



## B12-DE2

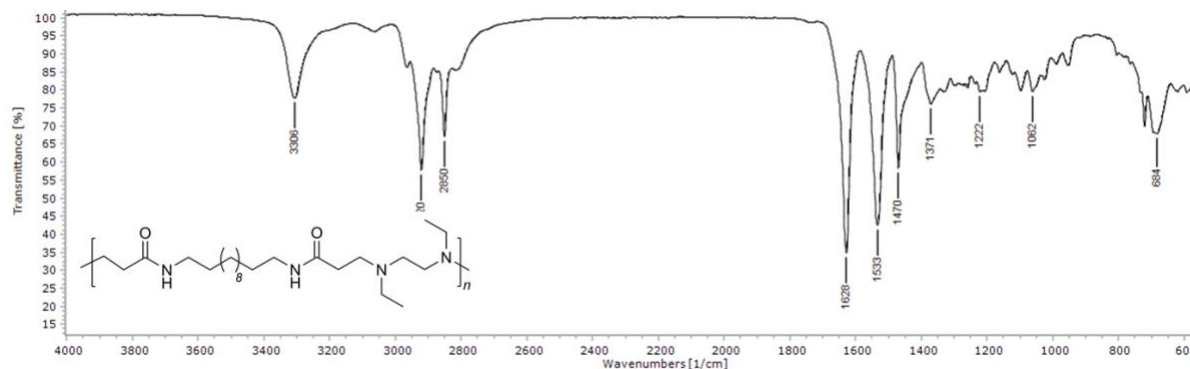

**Figure S18.** FT-IR/ATR spectrum of B12-DE2.

**Assignments:** 3306 cm<sup>-1</sup> (N-H stretching), 2920 and 2850 cm<sup>-1</sup> (C-H stretching), 1628 cm<sup>-1</sup> (C=O stretching), 1533 cm<sup>-1</sup> (N-H bending), 1470 and 1371 cm<sup>-1</sup> (CH<sub>2</sub> bending), 1222 and 1062 cm<sup>-1</sup> (C-N stretching), 684 cm<sup>-1</sup> (C-C bending).



## B12-DB2

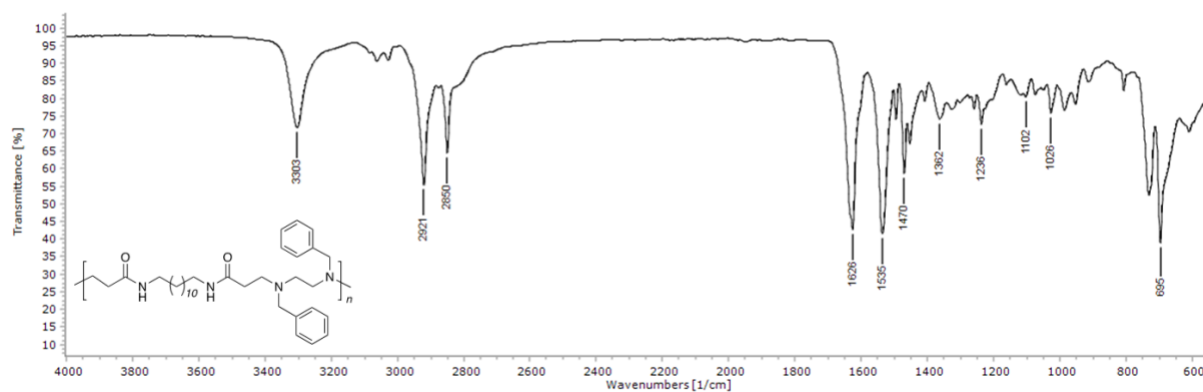

**Figure S19.** FT-IR/ATR spectrum of B12-DB2.

**Assignments:** 3303  $\text{cm}^{-1}$  (N-H stretching), 2921 and 2850  $\text{cm}^{-1}$  (C-H stretching), 1636  $\text{cm}^{-1}$  (C=O stretching), 1535  $\text{cm}^{-1}$  (N-H bending), 1470 and 1382  $\text{cm}^{-1}$  (CH<sub>2</sub> bending), 1236 and 1026  $\text{cm}^{-1}$  (C-N stretching), 1102 and 695  $\text{cm}^{-1}$  (C-C bending).



## B12-DM6

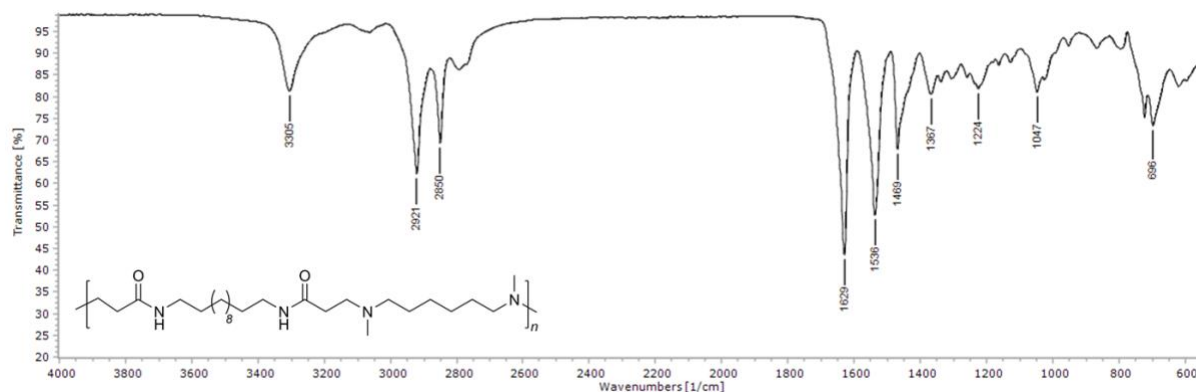

**Figure S20.** FT-IR/ATR spectrum of B12-DM6.

**Assignments:** 3305 cm<sup>-1</sup> (N-H stretching), 2921 and 2850 cm<sup>-1</sup> (C-H stretching), 1629 cm<sup>-1</sup> (C=O stretching), 1536 cm<sup>-1</sup> (N-H bending), 1469 and 1367 cm<sup>-1</sup> (CH<sub>2</sub> bending), 1224 and 1047 cm<sup>-1</sup> (C-N stretching), 696 cm<sup>-1</sup> (C-C bending).



## B12-PIP

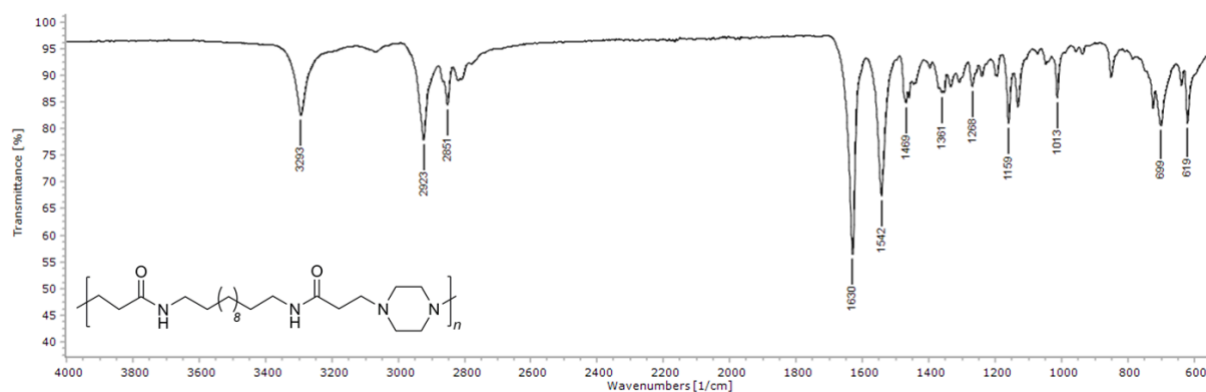

**Figure S21.** FT-IR/ATR spectrum of B12-PIP.

**Assignments:** 3293 cm<sup>-1</sup> (N-H stretching), 2923, 2951 and 2810 cm<sup>-1</sup> (C-H stretching), 1630 cm<sup>-1</sup> (C=O stretching), 1542 cm<sup>-1</sup> (N-H bending), 1469 and 1361 cm<sup>-1</sup> (CH<sub>2</sub> bending), 1268 and 1013 cm<sup>-1</sup> (C-N stretching), 1159, 699 and 619 cm<sup>-1</sup> (C-C bending).



The FTIR spectrum displays characteristic peaks for the polymer. Notable features include a broad peak around 3302 cm⁻¹ (N-H stretch), sharp peaks between 2800-3000 cm⁻¹ (C-H stretches), a strong carbonyl peak at 1627 cm⁻¹, and various fingerprint region peaks such as 1537, 1468, 1370, 1217, 1128, 1049, and 696 cm⁻¹.

\*CC(=O)NC(CCCCNC(=O)CC\*)

**Assignments:** 3302  $\text{cm}^{-1}$  (N-H stretching), 2923, 2850 and 2791  $\text{cm}^{-1}$  (C-H stretching), 1627  $\text{cm}^{-1}$  (C=O stretching), 1537  $\text{cm}^{-1}$  (N-H bending), 1468 and 1370  $\text{cm}^{-1}$  ( $\text{CH}_2$  bending), 1224 and 1049  $\text{cm}^{-1}$  (C-N stretching), 696  $\text{cm}^{-1}$  (C-C bending).



## B8-DM6

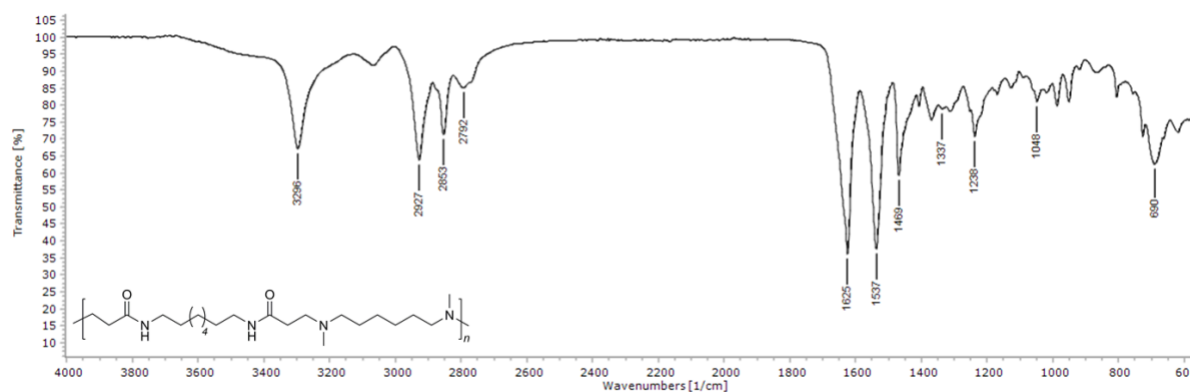

**Figure S23.** FT-IR/ATR spectrum of B8-DM6.

**Assignments:** 3300 cm<sup>-1</sup> (N-H stretching), 2927, 2851 and 2789 cm<sup>-1</sup> (C-H stretching), 1636 cm<sup>-1</sup> (C=O stretching), 1536 cm<sup>-1</sup> (N-H bending), 1467 and 1370 cm<sup>-1</sup> (CH<sub>2</sub> bending), 1217 and 1048 cm<sup>-1</sup> (C-N stretching), 698 cm<sup>-1</sup> (C-C bending).



## B6-DM2

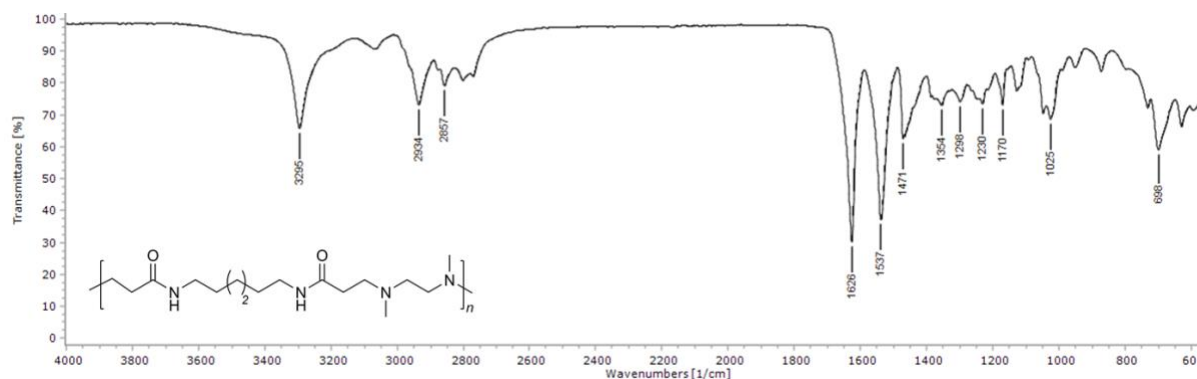

**Figure S24.** FT-IR/ATR spectrum of B6-DM2.

**Assignments:** 3297  $\text{cm}^{-1}$  (N-H stretching), 2932 and 2855  $\text{cm}^{-1}$  (C-H stretching), 1626  $\text{cm}^{-1}$  (C=O stretching), 1537  $\text{cm}^{-1}$  (N-H bending), 1461, 1365 and 1306  $\text{cm}^{-1}$  ( $\text{CH}_2$  bending), 1227 and 1043  $\text{cm}^{-1}$  (C-N stretching), 1178 and 698  $\text{cm}^{-1}$  (C-C bending).



## B6-DE2

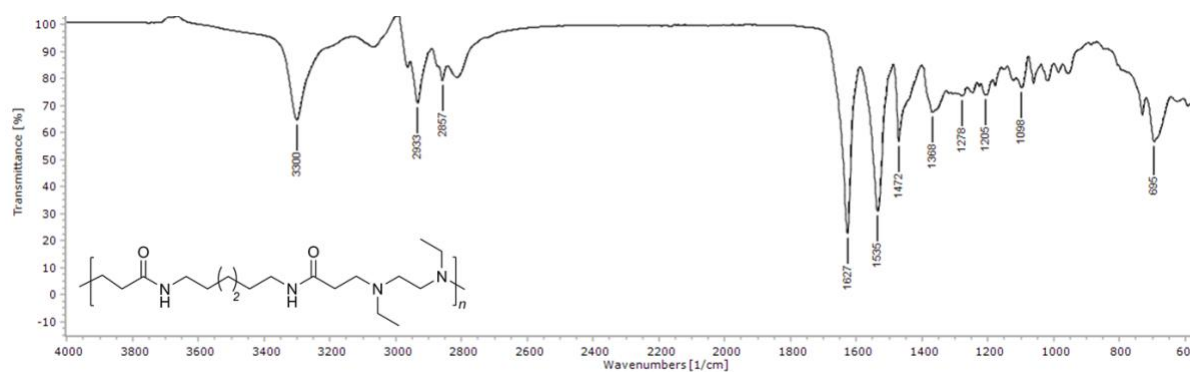

**Figure S25.** FT-IR/ATR spectrum of B6-DE2.

**Assignments:** 3300 cm<sup>-1</sup> (N-H stretching), 2933 and 2857 cm<sup>-1</sup> (C-H stretching), 1627 cm<sup>-1</sup> (C=O stretching), 1535 cm<sup>-1</sup> (N-H bending), 1472 and 1368 cm<sup>-1</sup> (CH<sub>2</sub> bending), 1205 cm<sup>-1</sup> (C-N stretching), 1098 and 695 cm<sup>-1</sup> (C-C bending).



## B6-DM6

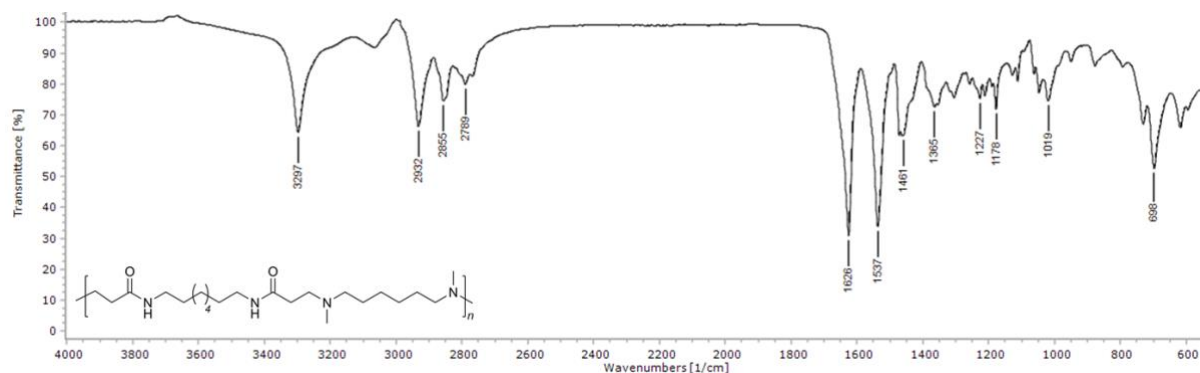

**Figure S26.** FT-IR/ATR spectrum of B6-DM6.

**Assignments:** 3297 cm<sup>-1</sup> (N-H stretching), 2932, 2855 and 2789 cm<sup>-1</sup> (C-H stretching), 1626 cm<sup>-1</sup> (C=O stretching), 1537 cm<sup>-1</sup> (N-H bending), 1461 and 1365 cm<sup>-1</sup> (CH<sub>2</sub> bending), 1227 and 1019 cm<sup>-1</sup> (C-N stretching), 698 cm<sup>-1</sup> (C-C bending).



## B6-PIP

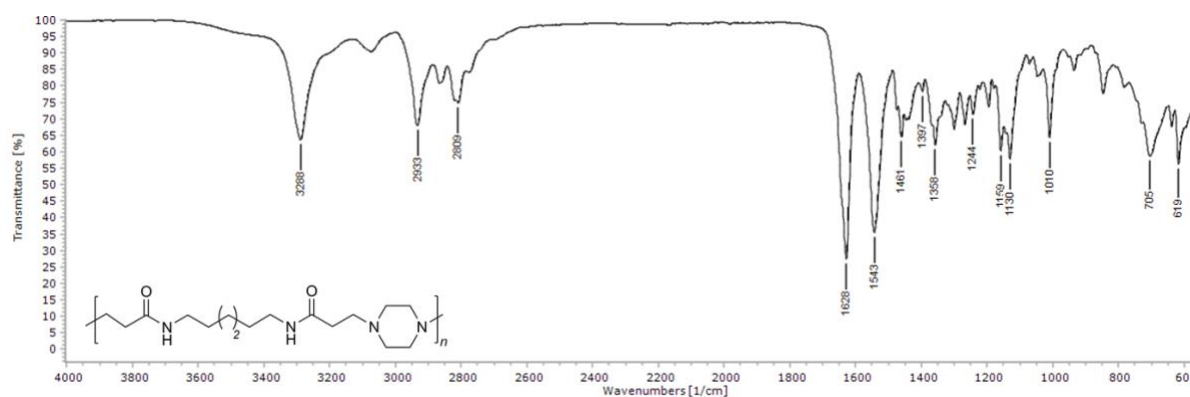

**Figure S27.** FT-IR/ATR of B6-PIP.

**Assignments:** 3288 cm<sup>-1</sup> (N-H stretching), 2933, 2951 and 2809 cm<sup>-1</sup> (C-H stretching), 1628 cm<sup>-1</sup> (C=O stretching), 1543 cm<sup>-1</sup> (N-H bending), 1461 and 1358 cm<sup>-1</sup> (CH<sub>2</sub> bending), 1244 and 1010 cm<sup>-1</sup> (C-N stretching), 1130, 705 and 619 cm<sup>-1</sup> (C-C bending).



## *b*B12-DM6

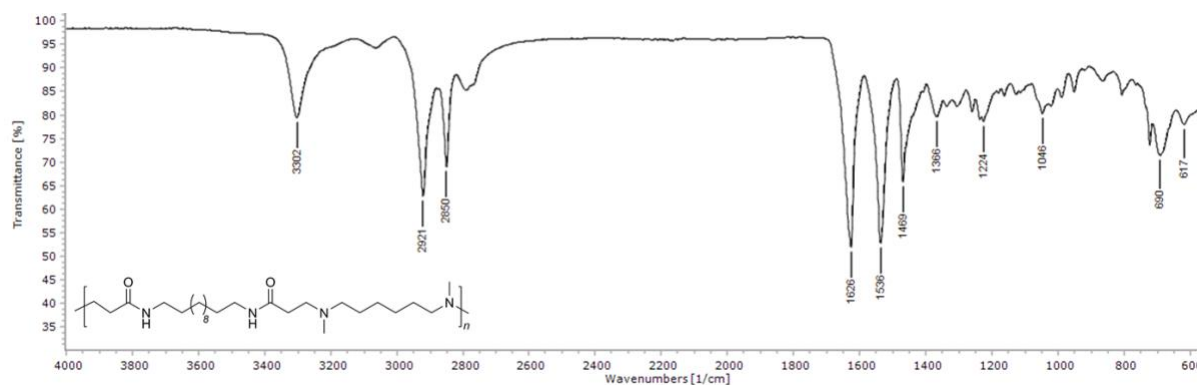

**Figure S28.** FT-IR/ATR spectrum of B12-DM6 from bulk synthesis.

**Assignments:** 3302 cm<sup>-1</sup> (N-H stretching), 2921 and 2850 cm<sup>-1</sup> (C-H stretching), 1626 cm<sup>-1</sup> (C=O stretching), 1536 cm<sup>-1</sup> (N-H bending), 1469 and 1366 cm<sup>-1</sup> (CH<sub>2</sub> bending), 1224 and 1046 cm<sup>-1</sup> (C-N stretching), 690 and 618 cm<sup>-1</sup> (C-C bending).



**Assignments:** 3297  $\text{cm}^{-1}$  (N-H stretching), 2927 and 2853  $\text{cm}^{-1}$  (C-H stretching), 1625  $\text{cm}^{-1}$  (C=O stretching), 1538  $\text{cm}^{-1}$  (N-H bending), 1469 and 1369  $\text{cm}^{-1}$  ( $\text{CH}_2$  bending), 1238 and 1048  $\text{cm}^{-1}$  (C-N stretching), 689  $\text{cm}^{-1}$  (C-C bending).



### TGA characterization

TGA analyses were performed in nitrogen and air, respectively, from 30 to 800 °C with a heating rate of 10 °C min<sup>-1</sup>. A Mettler-Toledo (Milano, Italy) thermogravimetric balance, TGA/DSC 2 Star<sup>®</sup> System, was used, placing samples (5 mg) in open alumina pans, in an inert or oxidative atmosphere (50 mL min<sup>-1</sup> gas flow).

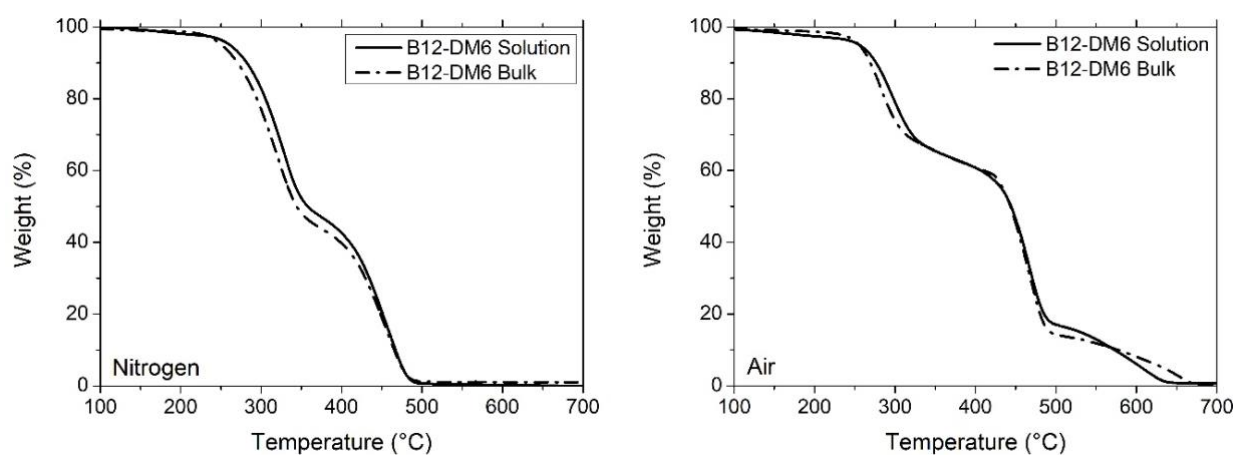

**Figure S30.** TG curves of B12-DM6 derived from solution and bulk synthesis in nitrogen (a) and air (b).



### *DSC characterization*

DSC analysis were performed on a Mettler-Toledo DSC823<sup>e</sup> System. In detail, 5 mg sample was placed in a standard Al pan and heated or cooled at 5 °C min<sup>-1</sup> under 80 mL min<sup>-1</sup> nitrogen flow, following the step of heating/cooling cycles:

- 1<sup>st</sup> step: heating from 25 °C to  $T_f$ , where  $T_f$  is the final T that is different for all polymers
- 2<sup>nd</sup> step: 1 min at  $T_f$
- 3<sup>rd</sup> step: cooling from  $T_f$  to 25 °C
- 4<sup>th</sup> step: 1 min at 25 °C
- 5<sup>th</sup> step: heating from 25 °C to  $T_f$

$T_g$  values were assessed by a TA Waters instrument Model DSCQ20 (Milano, Italy): samples (5.5 mg) were placed in standard aluminum crucibles and heated or cooled at 10 °C min<sup>-1</sup> under 80 mL min<sup>-1</sup> nitrogen flow. The heating program was as follows: 1<sup>st</sup> step: heating from 25 °C to  $T_f$ ; 2<sup>nd</sup> step: 1 min at  $T_f$ ; 3<sup>rd</sup> step: cooling from  $T_x$  to -50 °C; 4<sup>th</sup> step: 1 min at -50 °C; 5<sup>th</sup> step: heating from -50 °C to  $T_x$ .



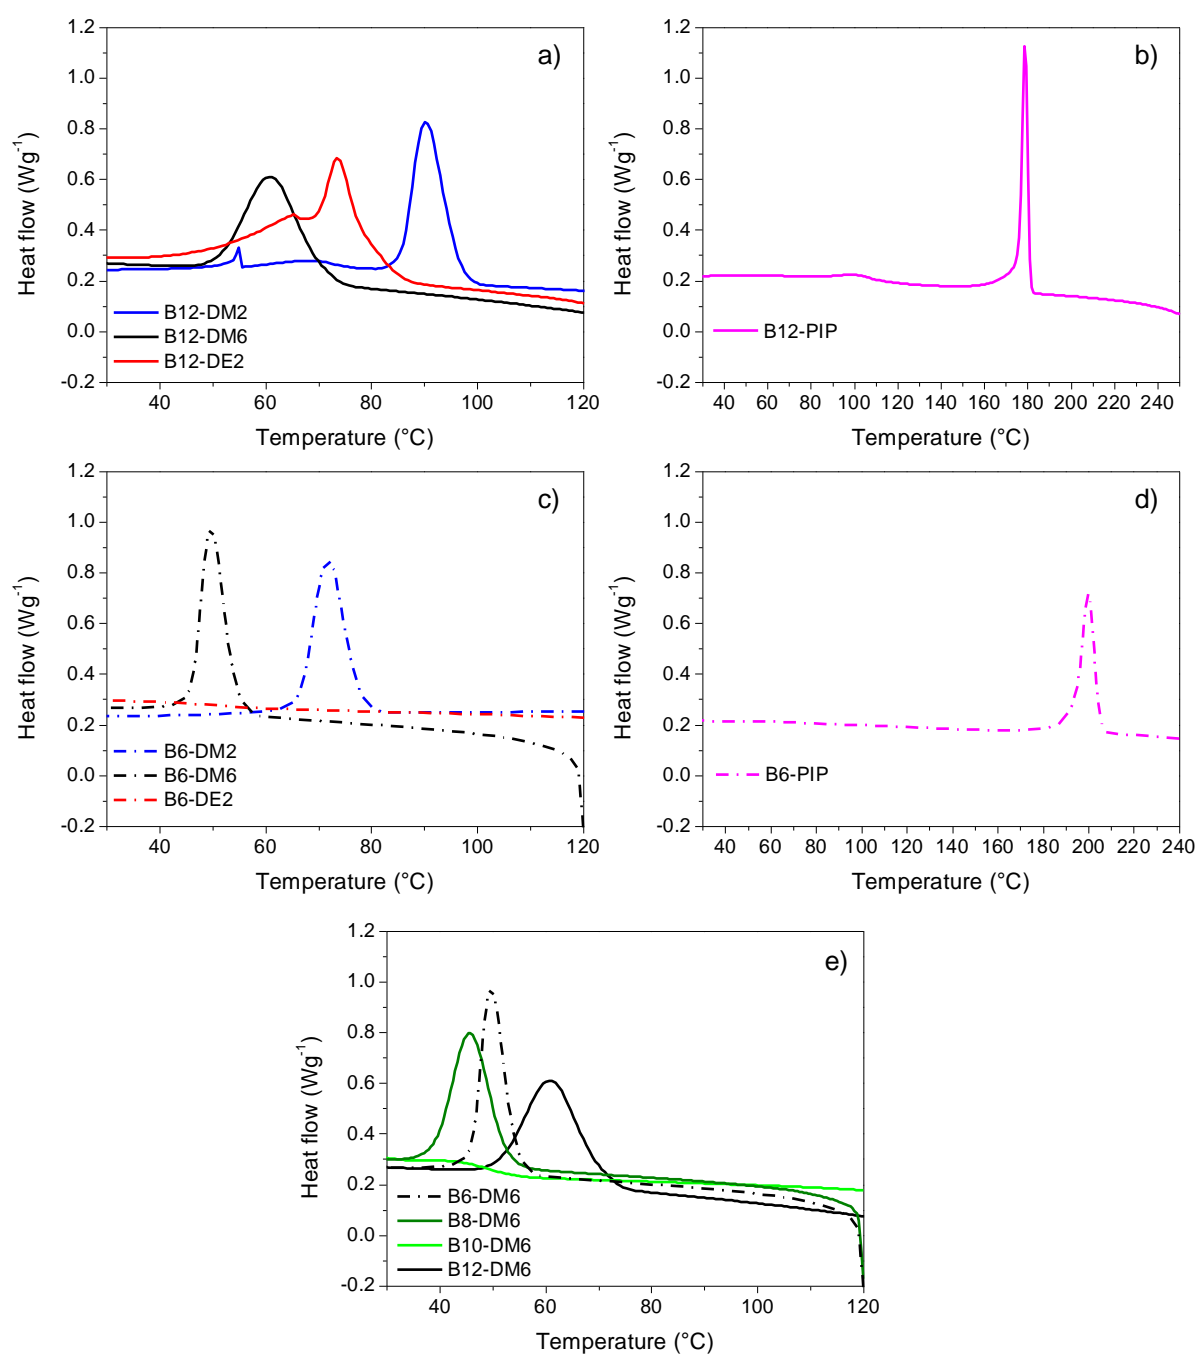

**Figure S31.** DSC thermograms of H-PAA derivatives pertaining to cooling cycle at 10  $^{\circ}\text{C}$   $\text{min}^{-1}$ .



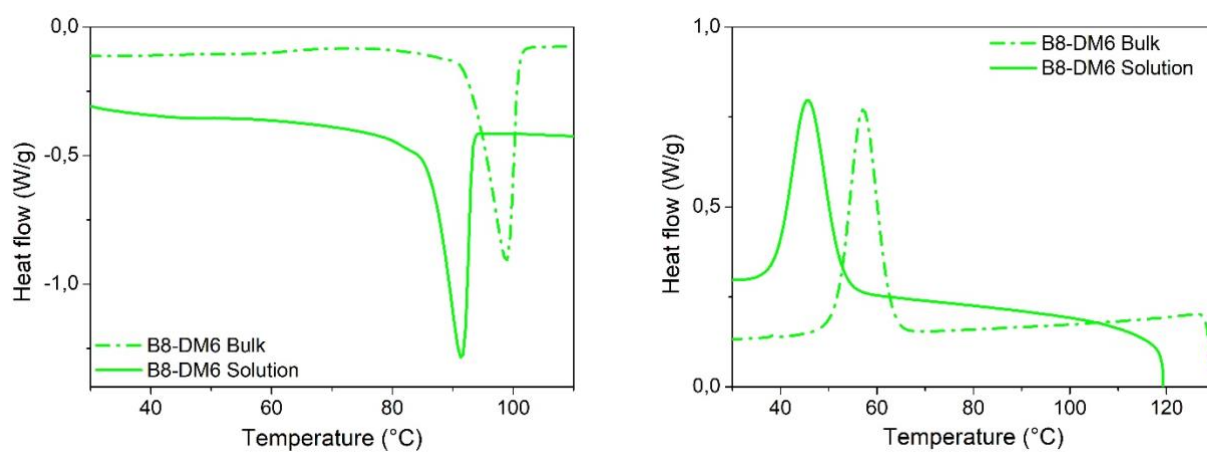

**Figure S32.** DSC thermograms of B8-DM6 samples obtained by synthesis in solution and bulk; panel a) 2<sup>nd</sup> heating cycle and panel b) cooling cycle.



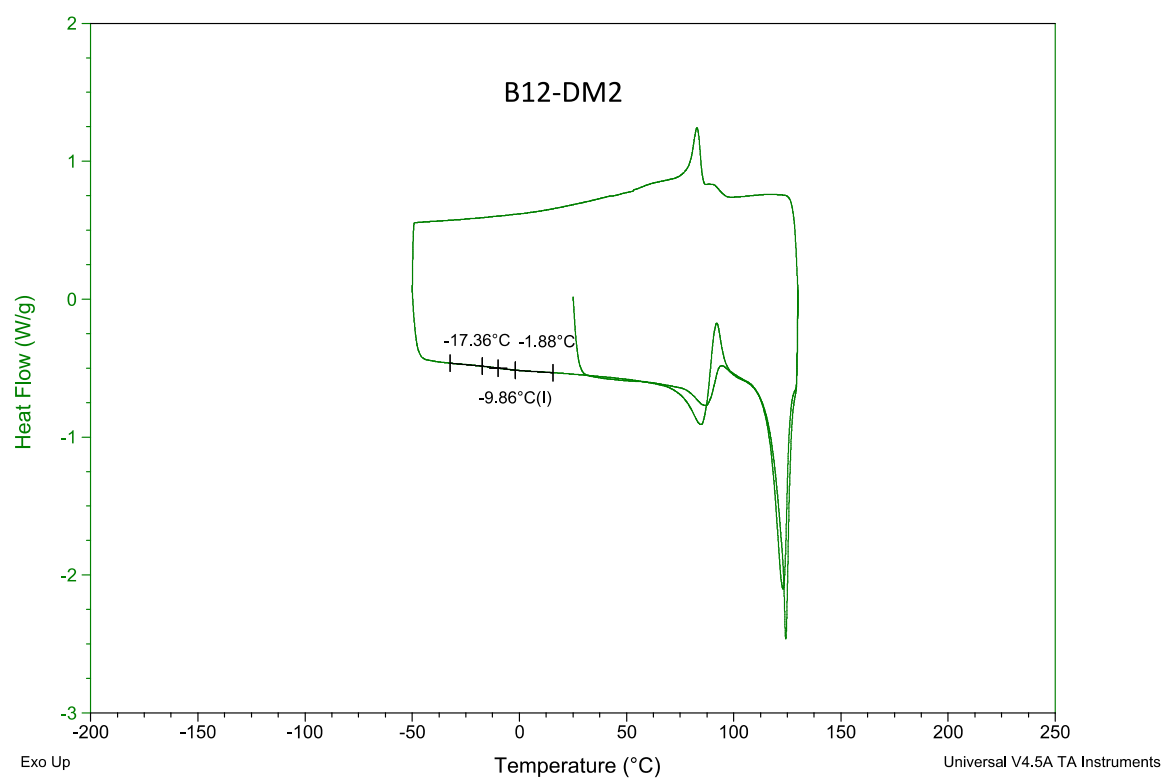

**Figure S33.** DSC thermograms of B12-DM2 for T<sub>g</sub> evaluation.



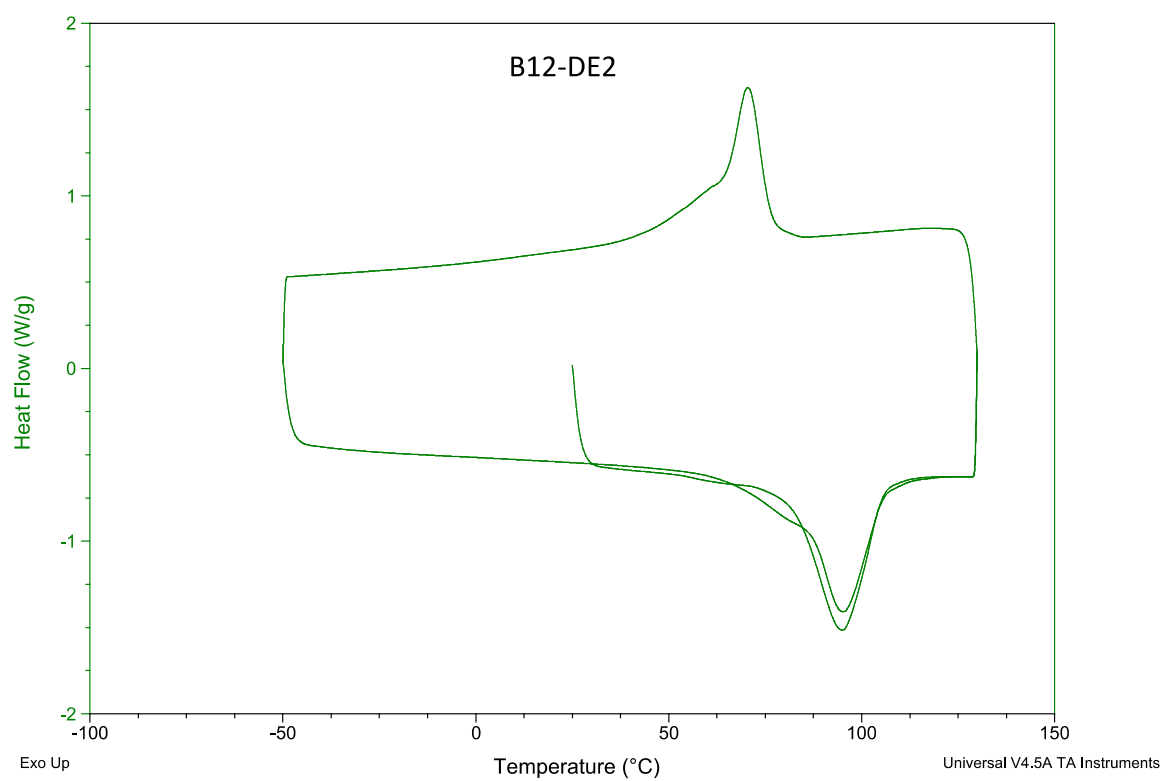

**Figure S34.** DSC thermograms of B12-DE2 for T<sub>g</sub> evaluation.



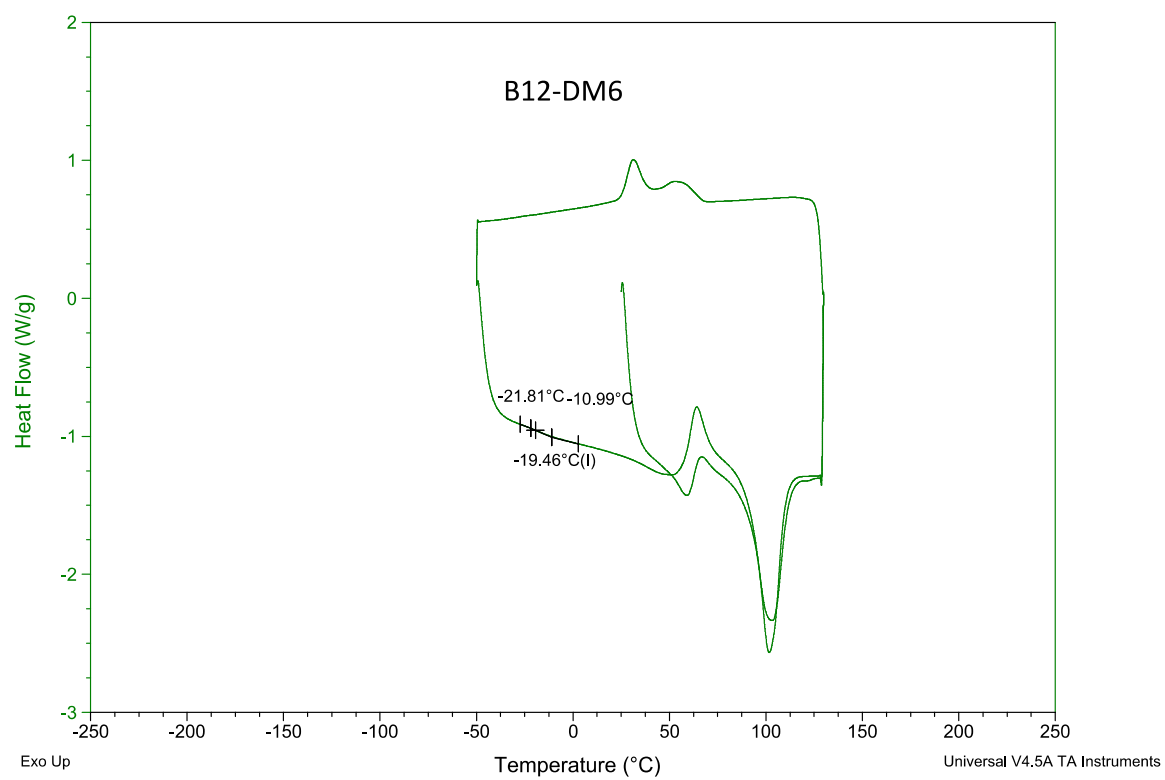

**Figure S35.** DSC thermograms of B12-DM6 for  $T_g$  evaluation.



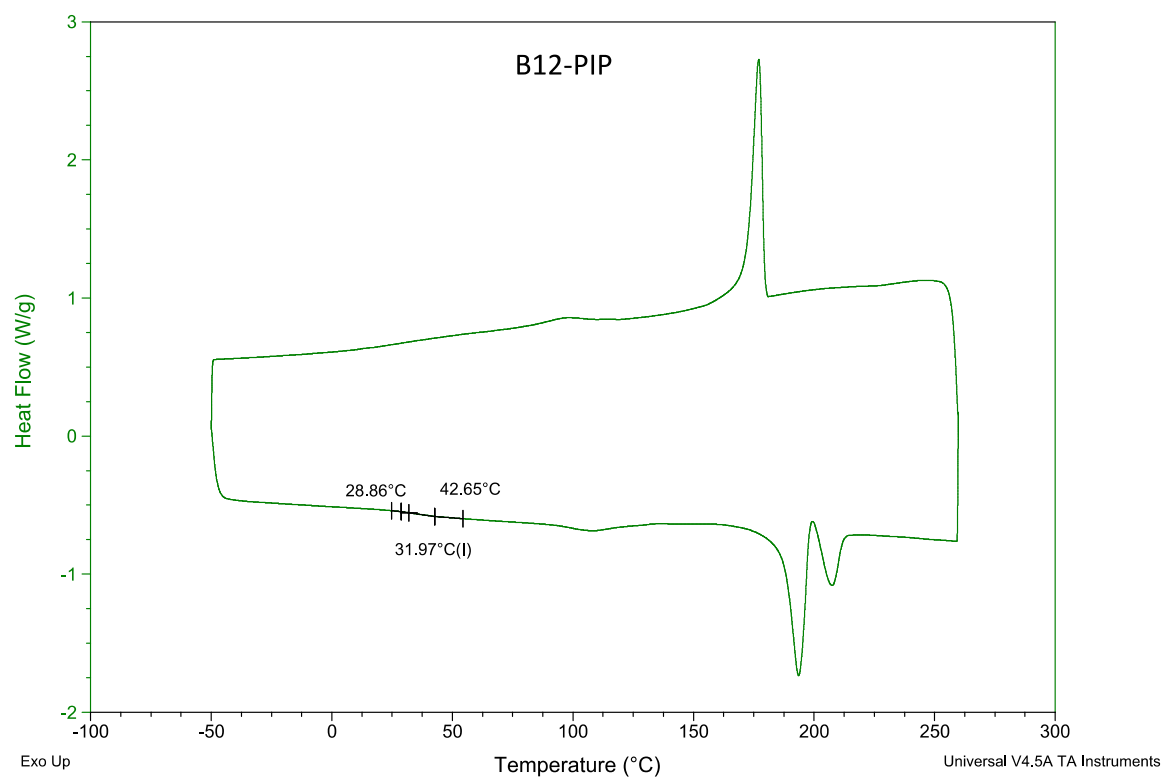

**Figure S36.** DSC thermograms of B12-PIP for  $T_g$  evaluation.



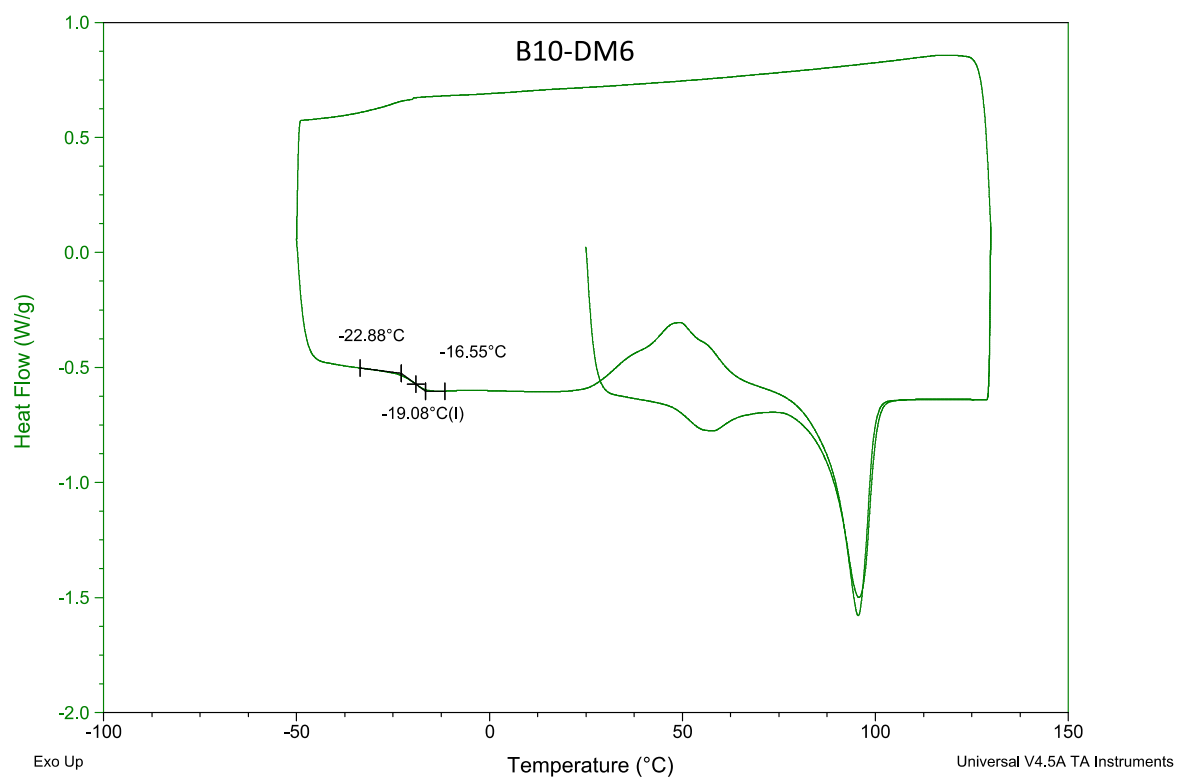

**Figure S37.** DSC thermograms of B10-DM6 for  $T_g$  evaluation.



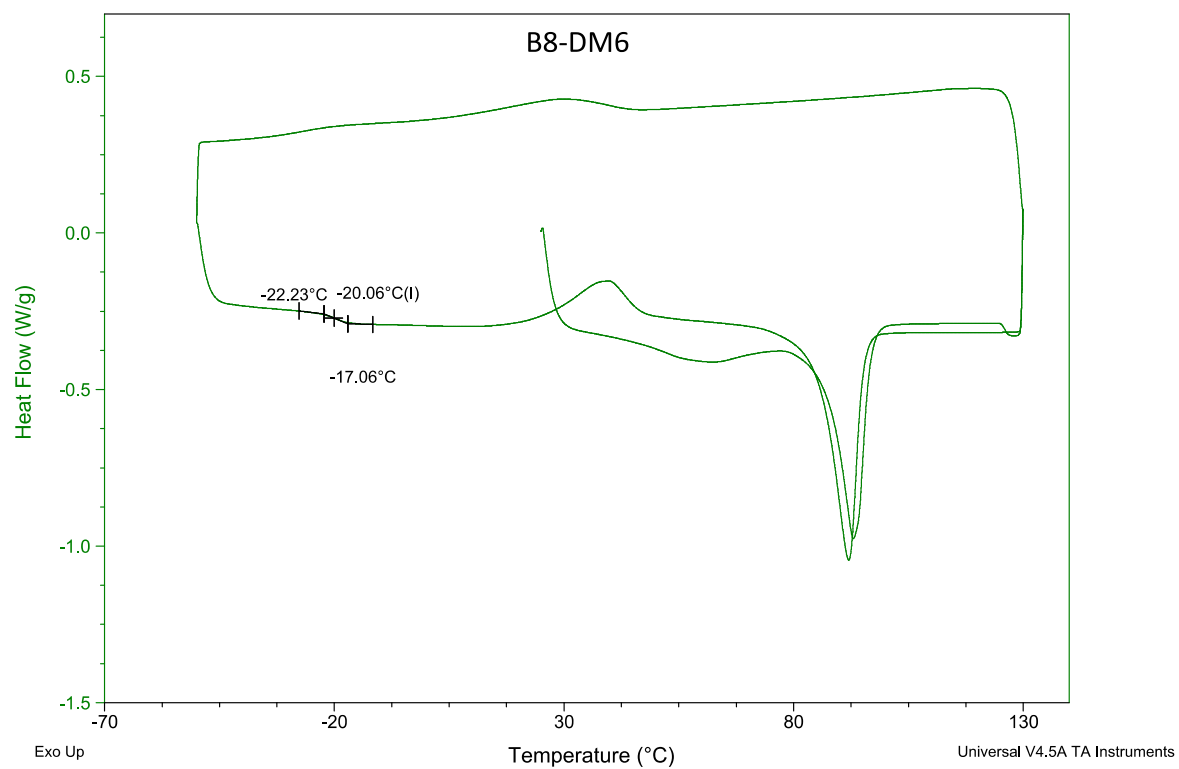

**Figure S38.** DSC thermograms of B8-DM6 for  $T_g$  evaluation.



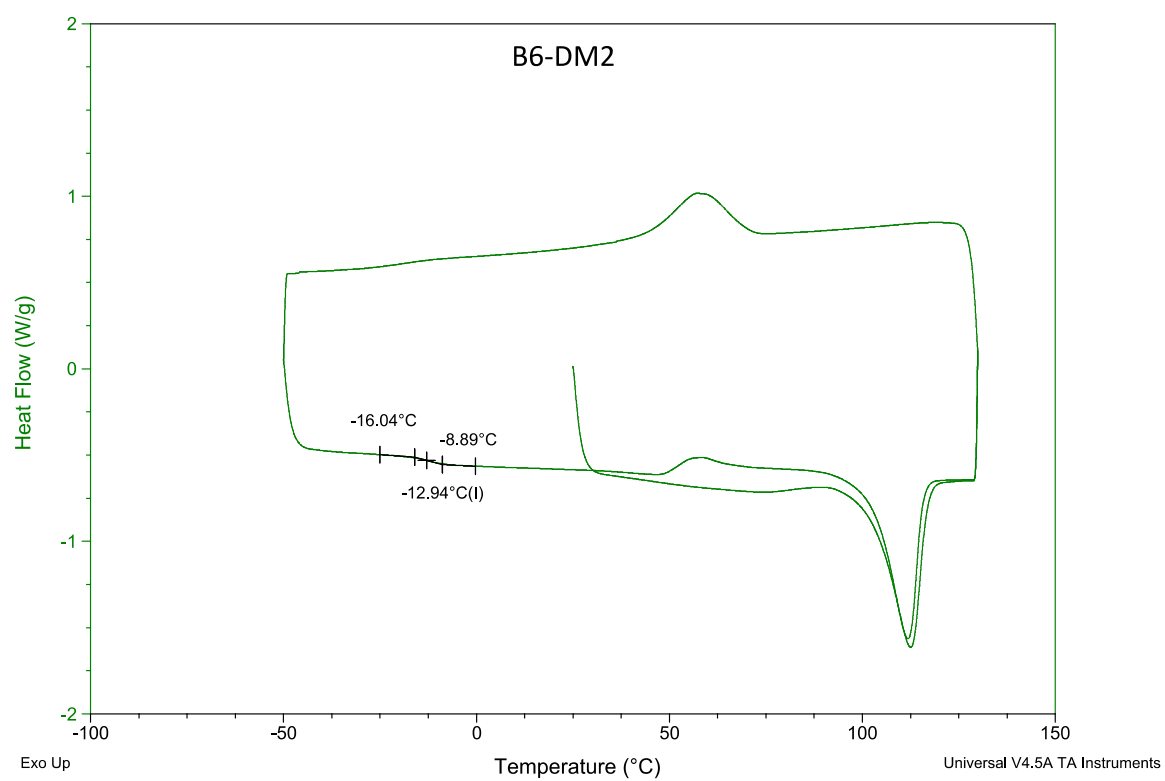

**Figure S39.** DSC thermograms of B6-DM2 for  $T_g$  evaluation.



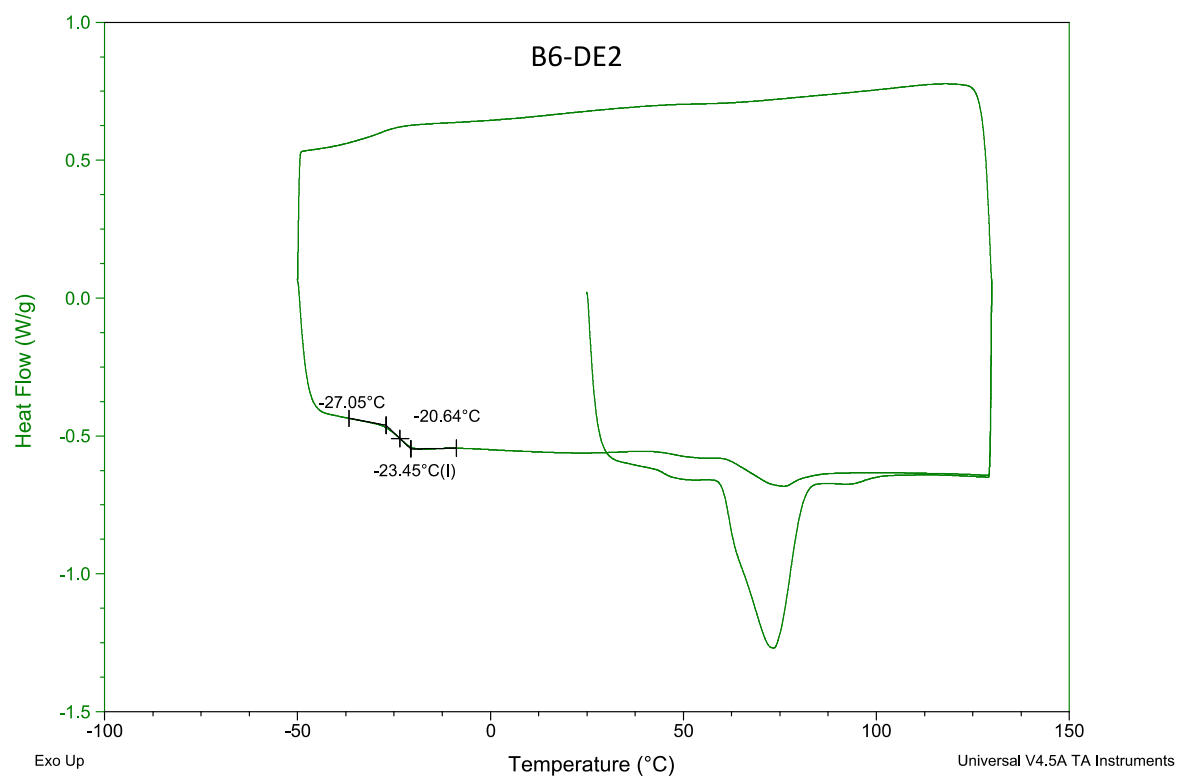

**Figure S40.** DSC thermograms of B6-DE2 for  $T_g$  evaluation.



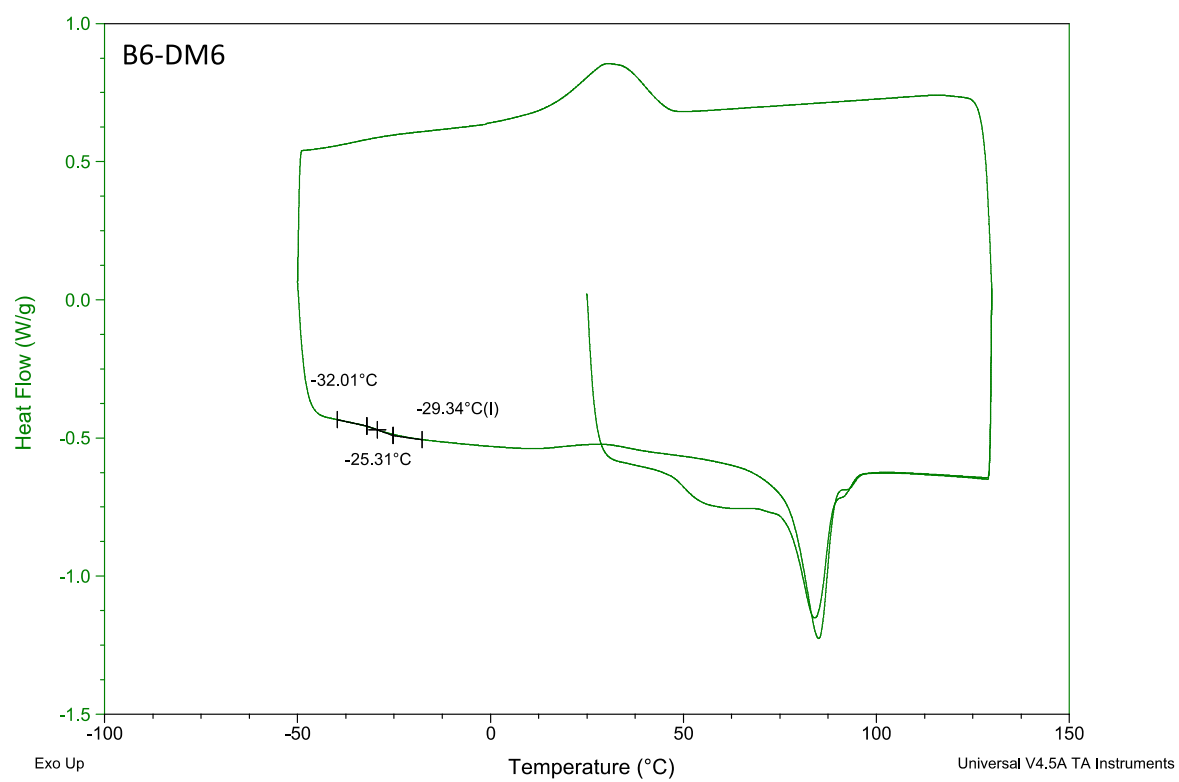

**Figure S41.** DSC thermograms of B6-DM6 for  $T_g$  evaluation.



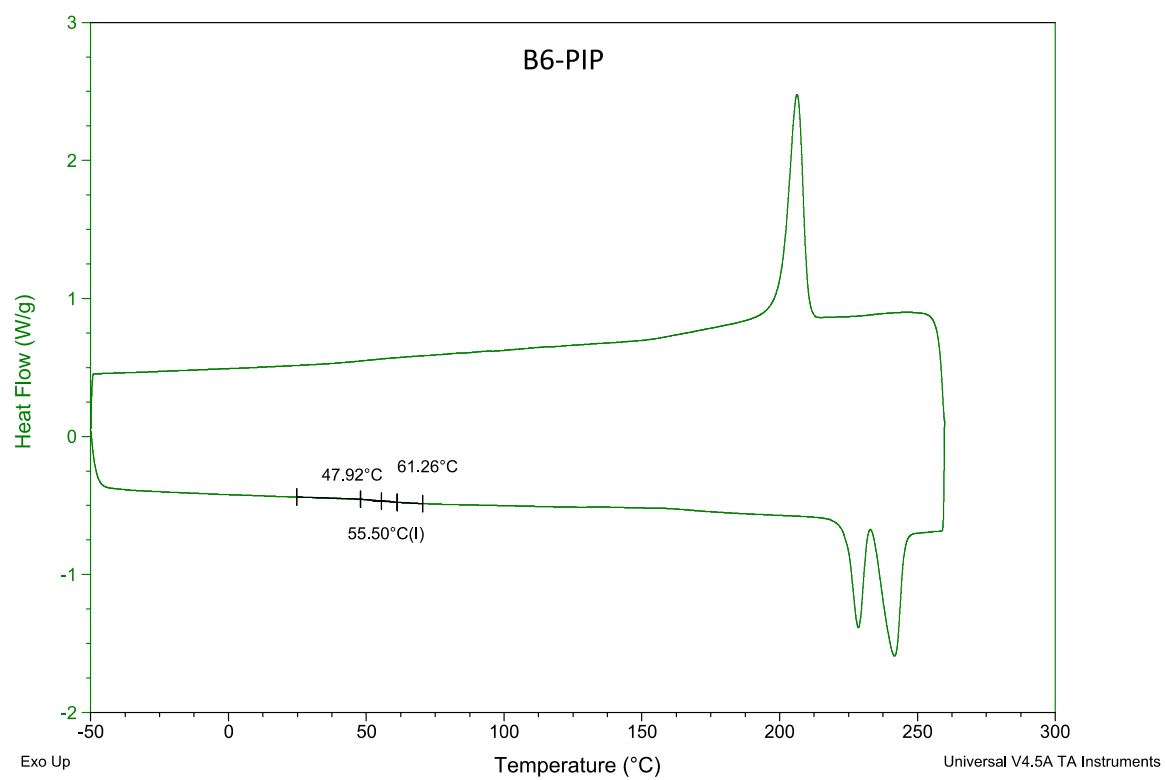

**Figure S42.** DSC thermograms of B6-PIP for  $T_g$  evaluation.



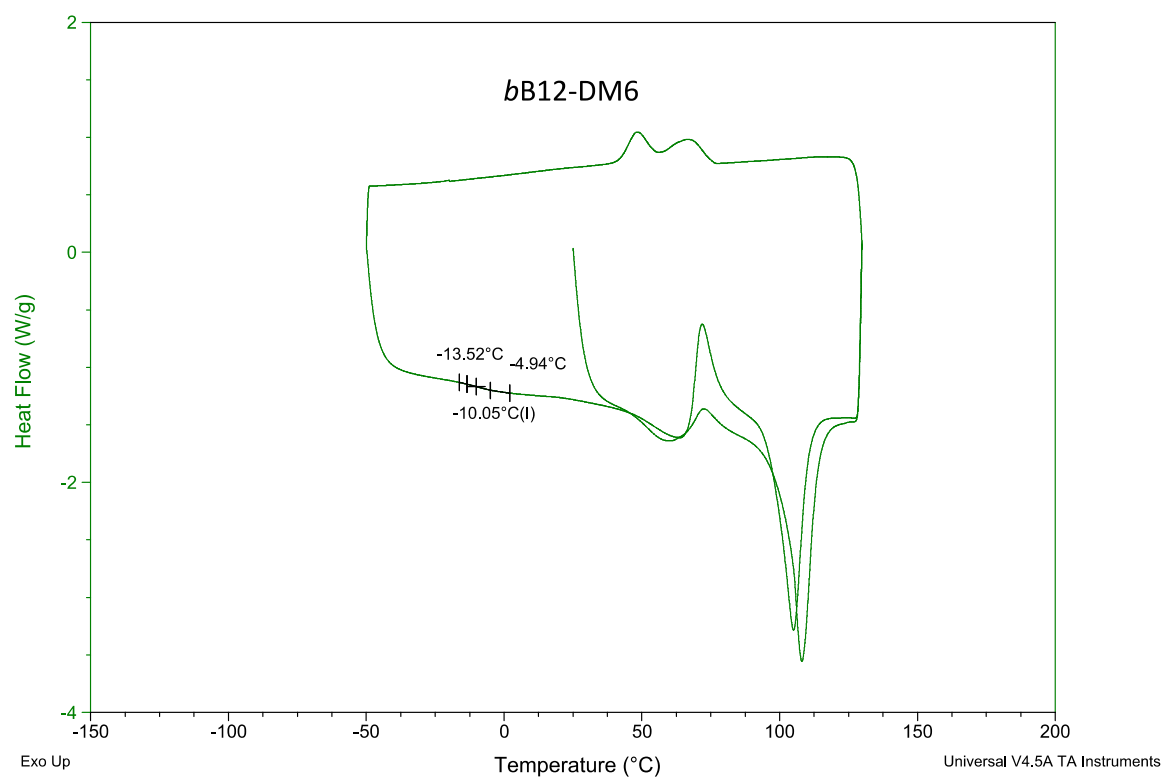

**Figure S43.** DSC thermograms of *bB12-DM6* for  $T_g$  evaluation.



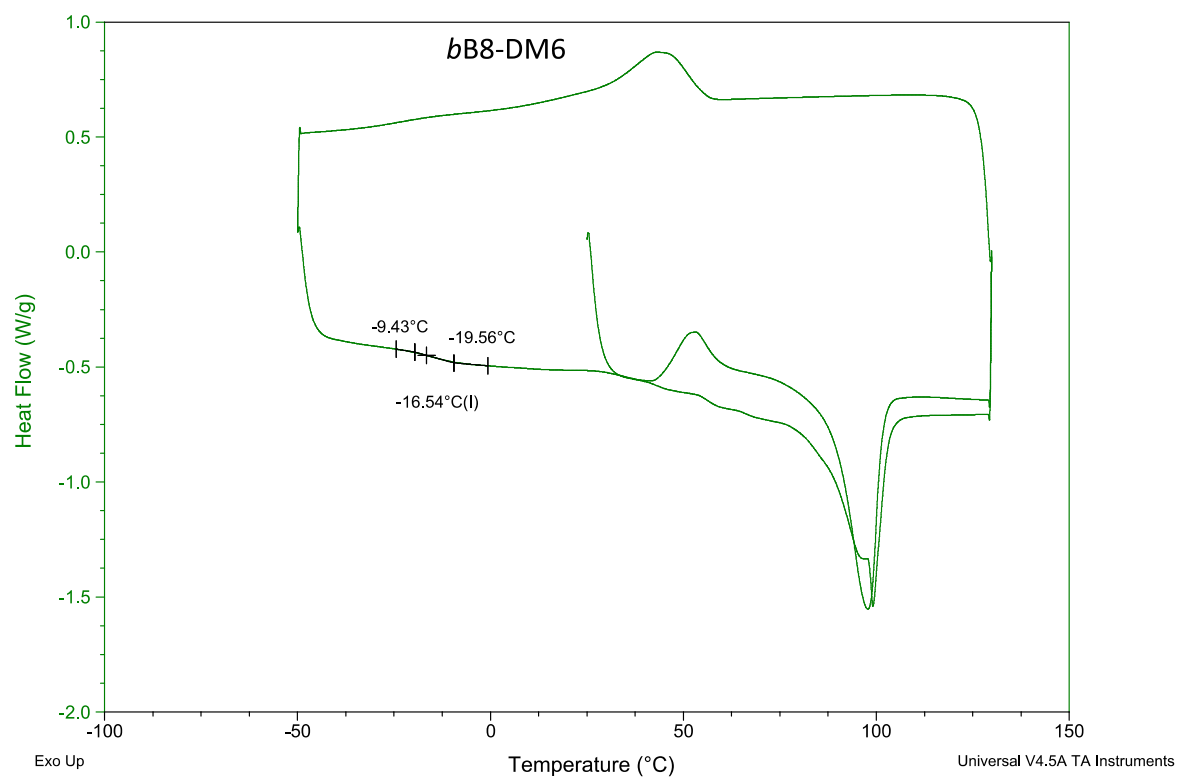

**Figure S44.** DSC thermograms of *bB8-DM6* for  $T_g$  evaluation.
